# Supplementary material for: Asymmetric hydroxyamination of oxindoles catalyzed by chiral bifunctional tertiary aminethiourea: construction of 3-amino-2-oxindoles with quaternary stereocenters
Source: Royal Society of Chemistry journal article supplement (doi:10.1039/c1ob06413d), 2011-09-27
Supplement: c1ob06413d.pdf [file c1ob06413d.pdf]

# Supplementary Information

## Chiral bifunctional thiourea-tertiary amine catalyzed enantioselective hydroxyamination of oxindoles

Li-Na Jia<sup>a,b</sup>, Jun Huang<sup>a,b</sup>, Lin Peng<sup>a</sup>, Liang-Liang Wang<sup>a,b</sup>,  
Jian-Fei Bai<sup>a,b</sup>, Fang Tian<sup>a</sup>, Guang-Yun He<sup>a</sup>, Xiao-Ying Xu<sup>a,\*</sup>,  
<sup>hu</sup>Li-Xin Wang<sup>a,\*</sup>

E-mail: [wlxioc@cioc.ac.cn](mailto:wlxioc@cioc.ac.cn), [xuxy@cioc.ac.cn](mailto:xuxy@cioc.ac.cn)

<sup>a</sup> Key Laboratory of Asymmetric Synthesis and Chirotechnology of Sichuan Province, Chengdu Institute of Organic Chemistry, Chinese Academy of Sciences, Chengdu, 610041, China; <sup>b</sup> Graduate University of Chinese Academy of Sciences, Beijing 10039, China.

### Contents

|                                                                               |        |
|-------------------------------------------------------------------------------|--------|
| 1. General methods                                                            | S2     |
| 2. General procedure for hydroxyamination of oxindoles<br>with nitrosobenzene | S2-14  |
| 3. NMR spectra                                                                | S14-31 |
| 4. HPLC chromatograms                                                         | S31-47 |

## 1. General methods

Commercial grade solvent was dried and purified by standard procedures as specified in Purification of Laboratory Chemicals, 4th Ed (Armarego, W. L. F.; Perrin, D. D. Butterworth Heinemann: 1997).  $^1\text{H}$  NMR spectra were recorded at 300 MHz. Chemical shifts were reported in ppm from tetramethylsilane with the solvent resonance as the internal standard ( $\text{CDCl}_3$ ,  $\delta = 7.26$  and  $\text{DMSO-}d^6$ ,  $\delta = 2.54$ ).  $^{13}\text{C}$  NMR spectra were recorded at 75 MHz (Bruker Avance). Chemical shifts are reported in ppm from the tetramethylsilane with the solvent resonance as internal standard ( $\text{CDCl}_3$ ,  $\delta = 77.0$  and  $\text{DMSO-}d^6$ ,  $\delta = 40.6$ ). Flash column chromatography was carried out using silica gel eluting with ethyl acetate and petroleum ether. Reactions were monitored by TLC and visualized with ultraviolet light. Enantiomeric excess (*ee*) was determined by HPLC analysis on chiralpak AD-H, or OD-H columns. IR spectra were recorded on a ThermoFisher Nicolet Avatar 360 FTIR spectrometer on a KBr beamsplitter. Optical rotations are reported as follows:  $[\alpha]_D^{20}$  (C in g/per 100 mL, THF).

## 2. General procedure for hydroxyamination of oxindoles with nitrosobenzene

Substrates **1a-p**,<sup>1</sup> nitrosobenzene **2**<sup>2</sup> and catalysts **4a-m**<sup>3</sup> were prepared according to literature methods.

## 2.1 General procedure for hydroxyamination of oxindoles 1a-j with nitrosobenzene.

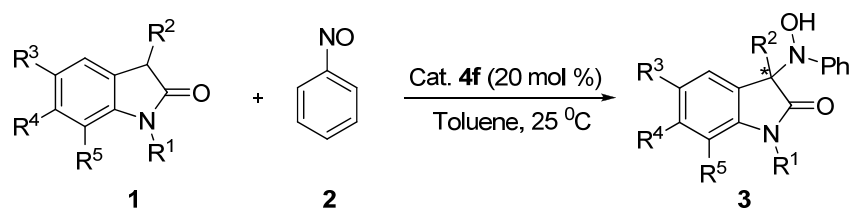

2-oxindole **1** (0.6 mmol), nitrosobenzene **2** (0.2 mmol) and catalyst **4f** (0.04 mmol) were stirred in 4.0 mL toluene at 25°C for 4-11 h in air. Then the reaction mixture was directly subjected to flash column chromatography on silica gel (petroleum ether / ethylacetate) to afford the corresponding products **3**.

(R)-1,3-dibenzyl-3-(hydroxy(phenyl)amino)indolin-2-one (**3a**)

Yield 86%; <sup>1</sup>H NMR (300 MHz, CDCl<sub>3</sub>): δ=7.48 (d, *J*=9.1 Hz, 1H), 7.38-7.40 (m, 1H), 7.23 (s, 1H), 6.98-7.18 (m, 11H), 6.85 (d, *J*=7.2 Hz, 2H), 6.47 (d, *J*=7.1 Hz, 2H), 6.16-6.19 (m, 1H), 4.56 (d, *J*=16.1 Hz, 1H), 4.45 (d, *J*=16.1 Hz, 1H), 3.78 (d, *J*=12.4 Hz, 1H), 3.53 (d, *J*=12.4 Hz, 1H); <sup>13</sup>C NMR (75 MHz, CDCl<sub>3</sub>): δ=175.2, 148.4, 143.1, 134.8, 134.3, 130.6, 129.0, 128.4, 127.7, 127.4, 126.9, 126.6, 126.5, 126.3, 126.2, 125.7, 124.1, 121.9, 109.1, 76.5, 43.2, 41.8; IR (KBr): ν=3346, 3060, 3030, 2924, 1709, 1694, 1610, 1487, 1466, 1454, 1373, 1359, 1176, 760, 730, 700, 648 cm<sup>-1</sup>; ESI-HRMS: Calcd for [C<sub>28</sub>H<sub>24</sub>N<sub>2</sub>NaO<sub>2</sub>, M+Na]<sup>+</sup>: 443.1730, FOUND: 443.1723. The *ee* was determined by HPLC analysis using a chiralcel AD column,

hexane/2-propanol 90:10, flow rate = 1.0 mL/min, 220 nm.  $t_R$  = 24.69 min (major), 26.46 min (minor), 83% *ee*,  $[\alpha]_D^{20} = -28$  (c 0.2, DCM).

(R)-1-benzyl-3-(4-fluorobenzyl)-3-(hydroxy(phenyl)amino)indolin-2-one (**3b**)

Yield 75%;  $^1\text{H}$  NMR (300 MHz,  $\text{CDCl}_3$ ):  $\delta = 7.36$  (d,  $J = 7.51$  Hz, 1H), 6.99-7.25 (m, 10H), 6.78 (t,  $J = 7.0$  Hz, 2H), 6.68 (t,  $J = 8.7$  Hz, 2H), 3.75 (d,  $J = 7.1$  Hz, 2H), 6.8 (d,  $J = 7.1$  Hz, 2H), 6.22 (d,  $J = 6.9$  Hz, 1H), 4.57 (d,  $J = 16.1$  Hz, 1H), 4.44 (d,  $J = 16.1$  Hz, 1H), 3.75 (d,  $J = 12.5$  Hz, 1H), 3.48 (d,  $J = 12.6$  Hz, 1H);  $^{13}\text{C}$  NMR (75 MHz,  $\text{CDCl}_3$ ):  $\delta = 174.6$ , 161.8 ( $J_{\text{C-F}} = 243.4$  Hz), 147.5, 143.1, 134.6, 132.1 ( $J_{\text{C-F}} = 7.9$  Hz), 129.8, 129.4, 128.4, 127.9, 127.4 ( $J_{\text{C-F}} = 7.0$  Hz), 127.2, 126.7, 126.0, 124.0, 122.2, 114.6 ( $J_{\text{C-F}} = 20.9$  Hz), 109.3, 77.2, 43.2, 40.1; IR (KBr):  $\nu = 3370$ , 3058, 2933, 2856, 1708, 1612, 1510, 1488, 1468, 1379, 1223, 1171, 1160, 1009, 943, 777, 755, 700  $\text{cm}^{-1}$ ; ESI-HRMS: Calcd for  $[\text{C}_{28}\text{H}_{23}\text{FN}_2\text{NaO}_2, \text{M} + \text{Na}]^+$ : 461.1636, FOUND: 461.1626. The *ee* was determined by HPLC analysis using a chiralcel AD column, hexane/2-propanol 90:10, flow rate = 1.0 mL/min, 220 nm.  $t_R$  = 21.64 min (major), 25.52 min (minor), 80% *ee*,  $[\alpha]_D^{20} = -25$  (c 0.1, DCM).

(R)-1-benzyl-3-(3-chlorobenzyl)-3-(hydroxy(phenyl)amino)indolin-2-one (**3c**)

Yield 87%;  $^1\text{H}$  NMR (300 MHz,  $\text{CDCl}_3$ ):  $\delta$ =7.37 (d,  $J$ =7.8Hz, 1H), 7.0-7.25 (m, 11H), 6.92 (t,  $J$ =7.8Hz, 1H), 6.84 (s, 1H), 6.74 (d,  $J$ =7.7Hz, 1H), 6.54 (d,  $J$ =7.0Hz, 2H), 6.22-6.25 (m, 1H), 4.46-4.58 (m, 2H), 3.75 (d,  $J$ =12.4Hz, 1H), 3.51 (d,  $J$ =12.5Hz, 1H);  $^{13}\text{C}$  NMR (75 MHz,  $\text{CDCl}_3$ ):  $\delta$ =174.4, 147.3, 143.0, 136.2, 134.6, 133.5, 130.6, 129.5, 128.5, 127.9, 127.2, 126.9, 126.7, 126.4, 125.7, 124.0, 122.3, 109.3, 76.4, 43.3, 41.1; IR (KBr):  $\nu$  =3357, 3058, 2923, 2854, 1710, 1609, 1597, 1486, 1466, 1372, 1210, 1193, 1008, 945, 815, 773, 755, 696  $\text{cm}^{-1}$ ; ESI-HRMS: Calcd for  $[\text{C}_{28}\text{H}_{23}\text{ClN}_2\text{NaO}_2, \text{M}+\text{Na}]^+$ : 477.1340, FOUND: 477.1335. The *ee* was determined by HPLC analysis using a chiralcel AD column, hexane/2-propanol 90:10, flow rate = 1.0 mL/min, 220 nm.  $t_{\text{R}}$  = 20.36 min (major), 21.68 min (minor), 81% *ee*,  $[\alpha]_{\text{D}}^{20}$  = -34 (c 0.2, DCM).

(R)-1-benzyl-3-(4-chlorobenzyl)-3-(hydroxy(phenyl)amino)indolin-2-one (**3d**)

Yield 71%;  $^1\text{H}$  NMR (300 MHz,  $\text{CDCl}_3$ ):  $\delta$ =7.33 (d,  $J$ =7.3Hz, 2H), 7.01-7.24 (m, 9H), 6.97 (d,  $J$ =8.4Hz, 2H), 6.75 (d,  $J$ =8.3Hz, 2H), 6.47 (d,  $J$ =7.4Hz, 2H), 6.23 (d,  $J$ =7.1Hz, 1H), 4.63 (d,  $J$ =16.1Hz, 1H), 4.40 (d,  $J$ =16.1Hz, 1H), 3.73 (d,  $J$ =12.4Hz, 1H), 3.46 (d,  $J$ =12.4Hz, 1H);  $^{13}\text{C}$  NMR (75 MHz,  $\text{CDCl}_3$ ):  $\delta$ =174.9, 148.2, 143.1, 134.6, 132.8, 132.6, 132.0, 129.3, 128.4, 127.9, 127.8, 127.7, 127.2, 126.3, 126.2, 126.0, 124.0, 122.1, 109.3, 76.2, 43.2, 41.0; IR (KBr):

$\nu = 3362, 3057, 2923, 2851, 1707, 1612, 1488, 1468, 1377, 1211, 1171, 945, 859, 815, 754, 698 \text{ cm}^{-1}$ ; ESI-HRMS: Calcd for  $[\text{C}_{28}\text{H}_{23}\text{ClN}_2\text{NaO}_2, \text{M}+\text{Na}]^+$ : 477.1340, FOUND: 477.1329. The *ee* was determined by HPLC analysis using a chiralcel AD column, hexane/2-propanol 90:10, flow rate = 1.0 mL/min, 220 nm.  $t_{\text{R}} = 25.25 \text{ min}$  (major), 27.49 min (minor), 82% *ee*,  $[\alpha]_{\text{D}}^{20} = -45$  (c 0.1, DCM).

(R)-1-benzyl-3-(4-bromobenzyl)-3-(hydroxy(phenyl)amino)indolin-2-one (**3e**)

Yield 83%;  $^1\text{H}$  NMR (300 MHz,  $\text{CDCl}_3$ ):  $\delta = 7.37$  (d,  $J = 6.7 \text{ Hz}$ , 1H), 7.02-7.23 (m, 12H), 6.73 (d,  $J = 8.3 \text{ Hz}$ , 2H), 6.47 (d,  $J = 7.7 \text{ Hz}$ , 2H), 6.23 (d,  $J = 8.1 \text{ Hz}$ , 1H), 4.67 (d,  $J = 16.1 \text{ Hz}$ , 1H), 4.40 (d,  $J = 16.0 \text{ Hz}$ , 1H), 3.74 (d,  $J = 12.5 \text{ Hz}$ , 1H), 3.48 (d,  $J = 12.4 \text{ Hz}$ , 1H);  $^{13}\text{C}$  NMR (75 MHz,  $\text{CDCl}_3$ ):  $\delta = 175.0, 148.2, 143.1, 134.7, 133.3, 132.3, 130.9, 129.3, 128.5, 127.8, 127.2, 126.3, 125.9, 124.0, 122.1, 120.8, 119.7, 109.3, 76.1, 43.3, 41.1$ ; IR (KBr):  $\nu = 3362, 3057, 2923, 2852, 1707, 1612, 1487, 1468, 1377, 1211, 1171, 1011, 858, 813, 754, 697 \text{ cm}^{-1}$ ; ESI-HRMS: Calcd for  $[\text{C}_{28}\text{H}_{23}\text{BrN}_2\text{NaO}_2, \text{M}+\text{Na}]^+$ : 521.0835, FOUND: 521.0836. The *ee* was determined by HPLC analysis using a chiralcel OD column, hexane/2-propanol 90:10, flow rate = 1.0 mL/min, 220 nm.  $t_{\text{R}} = 8.07 \text{ min}$  (major), 8.71 min (minor), 80% *ee*,  $[\alpha]_{\text{D}}^{20} = -47$  (c 0.1, DCM).

(R)-1-benzyl-3-(hydroxy(phenyl)amino)-3-(3-methylbenzyl)indolin-2-one (**3f**)

Yield 89%; <sup>1</sup>H NMR (300 MHz, CDCl<sub>3</sub>): δ=7.33-7.40 (m, 2H), 7.23-7.27 (m, 1H), 6.98-7.20 (m, 8H), 6.89-6.91 (m, 2H), 6.68 (s, 1H), 6.62 (d, *J*=6.6Hz, 1H), 6.46 (d, *J*=7.2Hz, 2H), 6.17-6.20 (m, 1H), 4.63 (d, *J*=16.1Hz, 1H), 4.42 (d, *J*=16.1Hz, 1H), 3.71-3.77 (m, 1H), 3.46-3.52 (m, 1H), 2.09 (s, 3H); <sup>13</sup>C NMR (75 MHz, CDCl<sub>3</sub>): δ=175.3, 148.4, 143.2, 137.2, 134.9, 134.2, 131.4, 129.0, 128.4, 127.7, 127.6, 127.5, 127.2, 126.9, 126.8, 126.6, 126.3, 125.7, 124.1, 121.8, 109.1, 76.4, 43.2, 41.7, 21.1; IR (KBr): ν =3349, 3051, 3027, 2924, 1708, 1609, 1486, 1466, 1373, 1211, 1174, 1010, 945, 917, 776, 698 cm<sup>-1</sup>; ESI-HRMS: Calcd for [C<sub>29</sub>H<sub>26</sub>N<sub>2</sub>NaO<sub>2</sub>, M+Na]<sup>+</sup>: 457.1886, FOUND: 457.1871. The *ee* was determined by HPLC analysis using a chiralcel AD column, hexane/2-propanol 75:25, flow rate = 1.0 mL/min, 220 nm. *t*<sub>R</sub> = 19.09 min (major), 21.83 min (minor), 77% *ee*, [α]<sub>D</sub><sup>20</sup> = -35 (c 0.1, DCM).

(R)-1-benzyl-3-(hydroxy(phenyl)amino)-3-(4-methoxybenzyl)indolin-2-one (**3g**)

Yield 71%; <sup>1</sup>H NMR (300 MHz, CDCl<sub>3</sub>): δ=7.36 (d, *J*=7.5Hz, 1H), 7.25 (d, *J*=6.9Hz, 2H), 7.01-7.20 (m, 8H), 6.75 (d, *J*=8.6Hz, 2H), 6.55 (d, *J*=8.6Hz, 2H), 6.45 (d, *J*=7.2Hz, 2H), 6.18-6.21 (m, 1H), 4.64 (d, *J*=16.1Hz, 1H), 4.42 (d, *J*=16.1Hz, 1H), 3.74 (d, *J*=12.6Hz,

1H), 3.70 (s, 3H), 3.46 (d,  $J=12.6\text{Hz}$ , 1H);  $^{13}\text{C}$  NMR (75 MHz,  $\text{CDCl}_3$ ): $\delta=174.8, 158.3, 147.7, 143.2, 134.7, 131.6, 129.2, 128.3, 127.8, 127.0, 126.3, 126.1, 126.0, 124.0, 122.0, 113.1, 109.2, 76.6, 54.9, 43.1, 40.7$ ; IR (KBr):  $\nu=3362, 3054, 2929, 1704, 1611, 1512, 1486, 1467, 1248, 1177, 1110, 945, 859, 775, 755, 699\text{ cm}^{-1}$ ; ESI-HRMS: Calcd for  $[\text{C}_{29}\text{H}_{26}\text{N}_2\text{NaO}_3, \text{M}+\text{Na}]^+$ : 473.1836, FOUND: 473.1835. The *ee* was determined by HPLC analysis using a chiralcel OD column, hexane/2-propanol 90:10, flow rate = 1.0 mL/min, 220 nm.  $t_{\text{R}} = 8.78\text{ min}$  (major), 9.56 min (minor), 77% *ee*,  $[\alpha]_{\text{D}}^{20} = -50$  (c 0.1, DCM).

(R)-3-benzyl-1-ethyl-3-(hydroxy(phenyl)amino)indolin-2-one (**3h**)

Yield 51%;  $^1\text{H}$  NMR (300 MHz,  $\text{CDCl}_3$ ): $\delta=7.47$  (s, 1H), 7.31 (d,  $J=7.3\text{Hz}$ , 1H), 7.17-7.22 (m, 2H), 7.12 (t,  $J=7.9\text{Hz}$ , 3H), 6.93-7.05 (m, 5H), 6.77 (d,  $J=7.0\text{Hz}$ , 2H), 6.41 (d,  $J=7.7\text{Hz}$ , 1H), 3.68 (d,  $J=12.3\text{Hz}$ , 1H), 3.34-3.45 (m, 2H), 3.19-3.30 (m, 1H), 0.63 (t,  $J=7.1\text{Hz}$ , 3H);  $^{13}\text{C}$  NMR (75 MHz,  $\text{CDCl}_3$ ): $\delta=174.8, 148.5, 142.9, 134.2, 130.4, 128.9, 127.6, 127.4, 127.0, 126.4, 125.5, 123.8, 121.7, 107.9, 76.1, 41.9, 34.0, 11.6$ ; IR (KBr):  $\nu=3357, 3057, 2934, 1700, 1610, 1487, 1467, 1452, 1377, 1214, 1099, 1028, 915, 769, 754, 699\text{ cm}^{-1}$ ; ESI-HRMS: Calcd for  $[\text{C}_{23}\text{H}_{22}\text{N}_2\text{NaO}_2, \text{M}+\text{Na}]^+$ : 381.1573, FOUND: 381.1561. The *ee* was determined by HPLC analysis using a chiralcel AD column, hexane/2-propanol 90:10, flow rate = 1.0



mL/min, 220 nm.  $t_R = 12.69$  min (major), 13.33 min (minor), 81% *ee*,  $[\alpha]_D^{20} = -11$  (c 0.2, DCM).

(R)-3-benzyl-5-bromo-3-(hydroxy(phenyl)amino)-1-methylindolin-2-one (**3i**)

Yield 85%;  $^1\text{H}$  NMR (300 MHz,  $\text{CDCl}_3$ ):  $\delta = 7.35$  (d,  $J = 1.5$  Hz, 1H), 7.17-7.29 (m, 4H), 6.96-7.13 (m, 5H), 6.77 (d,  $J = 5.9$  Hz, 2H), 6.27 (d,  $J = 8.3$  Hz, 1H), 3.61 (d,  $J = 12.4$  Hz, 1H), 3.33 (d,  $J = 12.4$  Hz, 1H), 2.73 (s, 3H);  $^{13}\text{C}$  NMR (75 MHz,  $\text{CDCl}_3$ ):  $\delta = 174.7, 148.0, 142.8, 133.6, 131.7, 130.2, 129.0, 128.9, 127.9, 127.6, 126.6, 126.0, 123.7, 114.6, 109.1, 76.6, 42.0, 25.7$ ; IR (KBr):  $\nu = 3293, 3061, 2924, 1707, 1607, 1485, 1364, 1271, 1100, 808, 773, 701$   $\text{cm}^{-1}$ ; ESI-HRMS: Calcd for  $[\text{C}_{22}\text{H}_{19}\text{BrN}_2\text{NaO}_2, \text{M} + \text{Na}]^+$ : 445.0522, FOUND: 445.0518. The *ee* was determined by HPLC analysis using a chiralcel AD column, hexane/2-propanol 90:10, flow rate = 1.0 mL/min, 220 nm.  $t_R = 12.48$  min (minor), 14.32 min (major), 75% *ee*,  $[\alpha]_D^{20} = -44$  (c 0.2, DCM).

(R)-3-(3-chlorobenzyl)-3-(hydroxy(phenyl)amino)-1-methylindolin-2-one (**3j**)

Yield 89%;  $^1\text{H}$  NMR (300 MHz,  $\text{CDCl}_3$ ):  $\delta = 7.52$  (s, 1H), 7.10-7.23 (m, 5H), 6.96-7.07 (m, 3H), 6.89 (t,  $J = 7.7$  Hz, 1H), 6.73 (s, 1H), 6.69 (d,  $J = 7.6$  Hz, 1H), 6.42 (d,  $J = 7.7$  Hz, 1H), 3.61 (d,  $J = 12.4$  Hz, 1H), 3.36 (d,  $J = 12.4$  Hz, 1H), 2.76 (s, 3H);  $^{13}\text{C}$  NMR (75 MHz,  $\text{CDCl}_3$ ):  $\delta =$

175.2, 148.3, 143.6, 136.3, 133.1, 130.2, 129.2, 128.6, 128.5, 127.7, 126.6, 126.3, 126.1, 125.7, 123.7, 122.1, 107.9, 76.1, 41.4, 25.6; IR (KBr):  $\nu = 3323, 3055, 2930, 1698, 1612, 1485, 1471, 1379, 1089, 949, 752, 670 \text{ cm}^{-1}$ ; ESI-HRMS: Calcd for  $[\text{C}_{22}\text{H}_{19}\text{ClN}_2\text{NaO}_2, \text{M}+\text{Na}]^+$ : 401.1027, FOUND: 401.1022. The *ee* was determined by HPLC analysis using a chiralcel AD column, hexane/2-propanol 90:10, flow rate = 1.0 mL/min, 220 nm.  $t_R = 11.48 \text{ min}$  (major), 13.40 min (minor), 77% *ee*,  $[\alpha]_D^{20} = -3$  (c 0.2, DCM).

## 2.2 General procedure for hydroxyamination of oxindoles 1k-p with nitrosobenzene.

2-oxindole **1** (0.6 mmol), nitrosobenzene **2** (0.2 mmol) and catalyst **4f** (0.04 mmol) were stirred in 4.0 mL toluene at 25°C for 1.5-3 h in air. The precipitate was filtered, washed with methylene dichloride and dried to afford the product as a white solid.

(R)-3-benzyl-3-(hydroxy(phenyl)amino)indolin-2-one (**3k**)<sup>4a,b</sup>

Yield 86%; <sup>1</sup>H NMR (300 MHz, DMSO-*d*<sup>6</sup>):  $\delta = 9.92$  (s, 1H), 9.09 (s, 1H), 7.43 (d,  $J = 7.1 \text{ Hz}$ , 1H), 6.82-7.19 (m, 12H), 6.35 (d,  $J = 7.4 \text{ Hz}$ , 1H), 3.41-3.52 (m, 2H); <sup>13</sup>C NMR (75 MHz, DMSO-*d*<sup>6</sup>):  $\delta = 175.5, 150.0, 142.0, 134.9, 130.2, 128.5, 127.6, 127.4, 126.2, 126.0, 124.4, 123.0, 120.7, 108.8, 76.0, 41.7$ . The *ee* was determined by HPLC analysis using a chiralcel AD column, hexane/2-propanol 90:10, flow rate = 1.0 mL/min, 220 nm.  $t_R = 23.36 \text{ min}$  (major), 26.40 min

(minor), 90% *ee*,  $[\alpha]_{\text{D}}^{20} = -89$  (c 0.2, THF).

(R)-3-(4-chlorobenzyl)-3-(hydroxy(phenyl)amino)indolin-2-one

**(3l)**<sup>4b</sup>

Yield 85%; <sup>1</sup>H NMR (300 MHz, DMSO-*d*<sup>6</sup>):  $\delta = 9.97$  (s, 1H), 9.11 (s, 1H), 7.42 (d, *J* = 7.1 Hz, 1H), 6.90-7.11 (m, 9H), 6.81 (d, *J* = 8.0 Hz, 2H), 6.37 (d, *J* = 7.4 Hz, 1H), 3.35-3.50 (m, 2H); <sup>13</sup>C NMR (75 MHz, DMSO-*d*<sup>6</sup>):  $\delta = 175.3, 150.0, 141.9, 134.0, 132.0, 131.1, 128.7, 127.4, 126.1, 124.5, 122.9, 120.9, 108.9, 75.9, 41.0$ . The *ee* was determined by HPLC analysis using a chiralcel AD column, hexane/2-propanol 90:10, flow rate = 1.0 mL/min, 220 nm.  $t_{\text{R}} = 23.80$  min (major), 28.42 min (minor), 82% *ee*,  $[\alpha]_{\text{D}}^{20} = -104$  (c 0.2, THF).

(R)-3-(3-bromobenzyl)-3-(hydroxy(phenyl)amino)indolin-2-one

**(3m)**

Yield 91%; <sup>1</sup>H NMR (300 MHz, DMSO-*d*<sup>6</sup>):  $\delta = 10.03$  (s, 1H), 9.13 (s, 1H), 7.44 (d, *J* = 6.1 Hz, 1H), 7.22 (d, *J* = 6.5 Hz, 1H), 6.98-7.11 (m, 9H), 6.79 (d, *J* = 6.6 Hz, 1H), 6.39 (d, *J* = 7.2 Hz, 1H) 3.37-3.52 (m, 2H); <sup>13</sup>C NMR (75 MHz, DMSO-*d*<sup>6</sup>):  $\delta = 175.3, 149.9, 141.9, 137.8, 132.9, 129.5, 129.4, 129.2, 128.8, 127.5, 127.2, 126.1, 124.5, 123.0, 120.9, 120.7, 108.9, 75.9, 41.2$ ; IR (KBr):  $\nu = 3237, 2918, 1702, 1618, 1469, 773, 753, 692$  cm<sup>-1</sup>; ESI-HRMS: Calcd for [C<sub>21</sub>H<sub>17</sub>BrN<sub>2</sub>NaO<sub>2</sub>, M+Na]<sup>+</sup>: 431.0366, FOUND: 431.0364. The *ee* was determined by HPLC analysis using a chiralcel AD column, hexane/2-propanol

90:10, flow rate = 1.0 mL/min, 220 nm.  $t_R$  = 18.31 min (major), 24.89 min (minor), 82% *ee*,  $[\alpha]_D^{20}$  = -63 (c 0.2, THF).

(R)-3-(4-bromobenzyl)-3-(hydroxy(phenyl)amino)indolin-2-one  
(**3n**)<sup>4b</sup>

Yield 84%; <sup>1</sup>H NMR (300 MHz, DMSO-*d*<sup>6</sup>):  $\delta$ =9.98 (s, 1H), 9.12 (s, 1H), 7.43 (d, *J*=7.2Hz, 1H), 7.21 (d, *J*=8.2Hz, 2H), 7.11-7.16 (m, 4H), 6.90-7.07 (m, 3H), 6.76 (d, *J*=8.2Hz, 2H), 6.39 (d, *J*=7.6Hz, 1H) 3.37-3.49 (m, 2H); <sup>13</sup>C NMR (75 MHz, DMSO-*d*<sup>6</sup>):  $\delta$ = 175.3, 150.0, 141.9, 134.4, 132.4, 130.3, 128.7, 127.5, 127.3, 126.1, 124.5, 122.9, 120.9, 119.7, 108.9, 75.9, 41.0. The *ee* was determined by HPLC analysis using a chiralcel AD column, hexane/2-propanol 90:10, flow rate = 1.0 mL/min, 220 nm.  $t_R$  = 25.53 min (major), 30.61 min (minor), 76% *ee*,  $[\alpha]_D^{20}$  = -95 (c 0.2, THF).

(R)-3-benzyl-6-chloro-3-(hydroxy(phenyl)amino)indolin-2-one (**3o**)

Yield 71%; <sup>1</sup>H NMR (300 MHz, DMSO-*d*<sup>6</sup>):  $\delta$ =10.13 (s, 1H), 9.18 (s, 1H), 7.41 (d, *J*=7.8Hz, 1H), 6.96-7.15 (m, 10H), 6.84 (s, 1H), 6.37 (s, 1H), 3.39-3.49 (m, 2H); <sup>13</sup>C NMR (75 MHz, DMSO-*d*<sup>6</sup>):  $\delta$ =175.5, 149.7, 143.5, 134.6, 132.7, 130.2, 127.6, 126.5, 124.8, 123.1, 120.5, 108.8, 75.9, 41.4; IR (KBr):  $\nu$ =3269, 3030, 2919, 1716, 1669, 1617, 1489, 1479, 1453, 1356, 1069, 964, 907, 857, 820, 765, 696; ESI-HRMS: Calcd for [C<sub>21</sub>H<sub>17</sub>ClN<sub>2</sub>NaO<sub>2</sub>, M+Na]<sup>+</sup>: 387.0871, FOUND: 387.0883. The *ee* was determined by HPLC analysis using

a chiralcel OD column, hexane/2-propanol 90:10, flow rate = 1.0 mL/min, 220 nm.  $t_R$  = 7.10 min (major), 12.45 min (minor), 75% *ee*,  $[\alpha]_D^{20} = -52$  (c 0.2, THF).

(R)-3-benzyl-7-fluoro-3-(hydroxy(phenyl)amino)indolin-2-one (**3p**)

Yield 71%;  $^1\text{H NMR}$  (300 MHz,  $\text{DMSO-}d^6$ ):  $\delta$  = 10.48 (s, 1H), 9.21 (s, 1H), 7.26-7.29 (m, 1H), 7.13-7.18 (m, 4H), 7.02-7.04 (m, 4H), 6.83-6.97 (m, 2H), 6.80-6.83 (m, 2H), 3.41-3.51 (m, 2H);  $^{13}\text{C NMR}$  (75 MHz,  $\text{DMSO-}d^6$ ):  $\delta$  = 175.4, 149.8, 145.8 ( $J_{\text{C-F}} = 240\text{Hz}$ ), 134.6, 130.2, 127.6, 126.5, 124.8, 123.1, 122.2, 121.6 ( $J_{\text{C-F}} = 5.6\text{Hz}$ ), 115.6 ( $J_{\text{C-F}} = 17.0\text{Hz}$ ), 76.4, 41.7; IR (KBr):  $\nu$  = 3263, 3032, 2928, 1719, 1688, 1644, 1602, 1491, 1454, 1215, 1183, 916, 834, 796, 760, 699; ESI-HRMS: Calcd for  $[\text{C}_{21}\text{H}_{17}\text{FN}_2\text{NaO}_2, \text{M}+\text{Na}]^+$ : 371.1166, FOUND: 371.1167. The *ee* was determined by HPLC analysis using a chiralcel AD column, hexane/2-propanol 95:5, flow rate = 1.0 mL/min, 220 nm.  $t_R$  = 20.33 min (minor), 31.09 min (major), 78% *ee*,  $[\alpha]_D^{20} = -49$  (c 0.2, THF).

### 2.3 Procedure for cleave of the N-O bond.<sup>4b</sup>

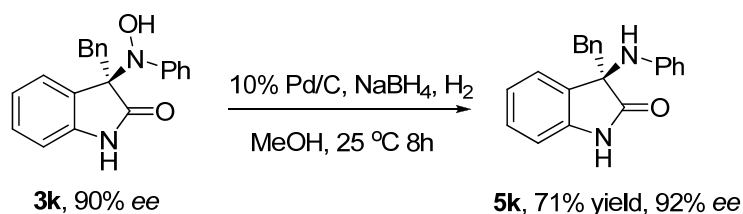

**3k** (0.2 mmol), Pd/C (4.9 mg, 10%) and sodium borohydride (0.6 mmol) were stirred in 1.0 mL methanol at 25°C for 8 h in

hydrogen. Then the reaction mixture was filtered through celite and the filtrate was concentrated in vacuum. Column chromatography on silica gel (petroleum ether / ethylacetate 7:1) afford the corresponding products **5k**.

(R)-3-benzyl-3-(phenylamino)indolin-2-one (**5k**)

Yield 71%; <sup>1</sup>H NMR (300 MHz, CDCl<sub>3</sub>): δ=8.32 (s, 1H), 7.10-7.21 (m, 6H), 6.89-6.95 (m, 4H), 6.67-6.69 (m, 2H), 6.29 (d, *J*=7.7Hz, 2H), 4.68 (s, 1H), 3.26 (dd, *J*=27.4Hz, *J*=12.4Hz, 2H); <sup>13</sup>C NMR (75 MHz, CDCl<sub>3</sub>): δ=180.3, 145.1, 140.0, 133.1, 130.4, 129.4, 129.0, 127.8, 127.2, 124.5, 122.7, 119.0, 114.8, 110.5, 66.1, 46.3; IR (KBr): ν=3340, 3136, 3028, 1709, 1604, 1524, 1499, 1471, 1320, 1224, 1186, 751, 701, 667; ESI-HRMS: Calcd for [C<sub>21</sub>H<sub>18</sub>N<sub>2</sub>NaO, M+Na]<sup>+</sup>: 337.1311, FOUND: 337.1319. The *ee* was determined by HPLC analysis using a chiralcel OD column, hexane/2-propanol 90:10, flow rate = 1.0 mL/min, 254 nm. *t<sub>R</sub>* = 9.87 min (major), 11.69 min (minor), 92% *ee*, [α]<sub>D</sub><sup>20</sup> = -5 (c 0.18, DCM).

## References

1. (a) L. Cheng, L. Liu, H. Jia and D. Wang, Y.-J. Chen, *J. Org. Chem.*, 2009, **74**, 4650; (b) A. Huang, J. Kodanko and L. E. Overman, *J. Am. Chem. Soc.*, 2004, **126**, 14043; (c) B. M. Trost, Y. Zhang and T. Zhang, *J. Org. Chem.*, 2009, **74**, 5115; (d) L. Cheng, L. Liu and D. Wang and Y. -J. Chen, *Org. Lett.*, 2009, **11**,

3874.

- (a) G. H. Coleman, C. M. McCloskey and F. A. Stuart, *Org. Syn.*, 1955, **3**, 668; (b) E. L. Robert and R. L. Marion, *J. Org. Chem.*, 1937, **2**, 68.
- L. Li, E. G. Klauber and D. Seidel, *J. Am. Chem. Soc.*, 2008, **130**, 12248.
- (a) T. Zhang, L. Cheng, L. Liu, D. Wang and Y. -J. Chen, *Tetrahedron: Asymmetry*, 2010, **21**, 2800; (b) K. Shen, X.-H. Liu, G. Wang, L.-L. Lin and X.-M. Feng, *Angew. Chem. Int. Ed.*, 2011, **50**, 4684.

## 5. NMR spectra

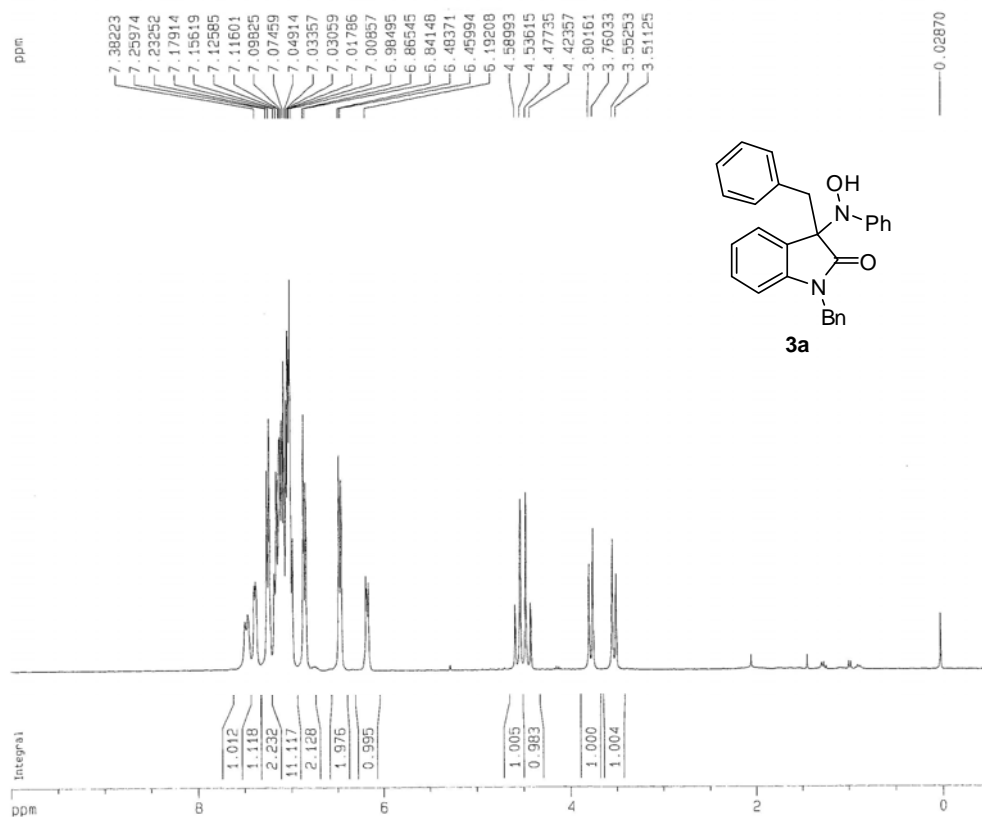

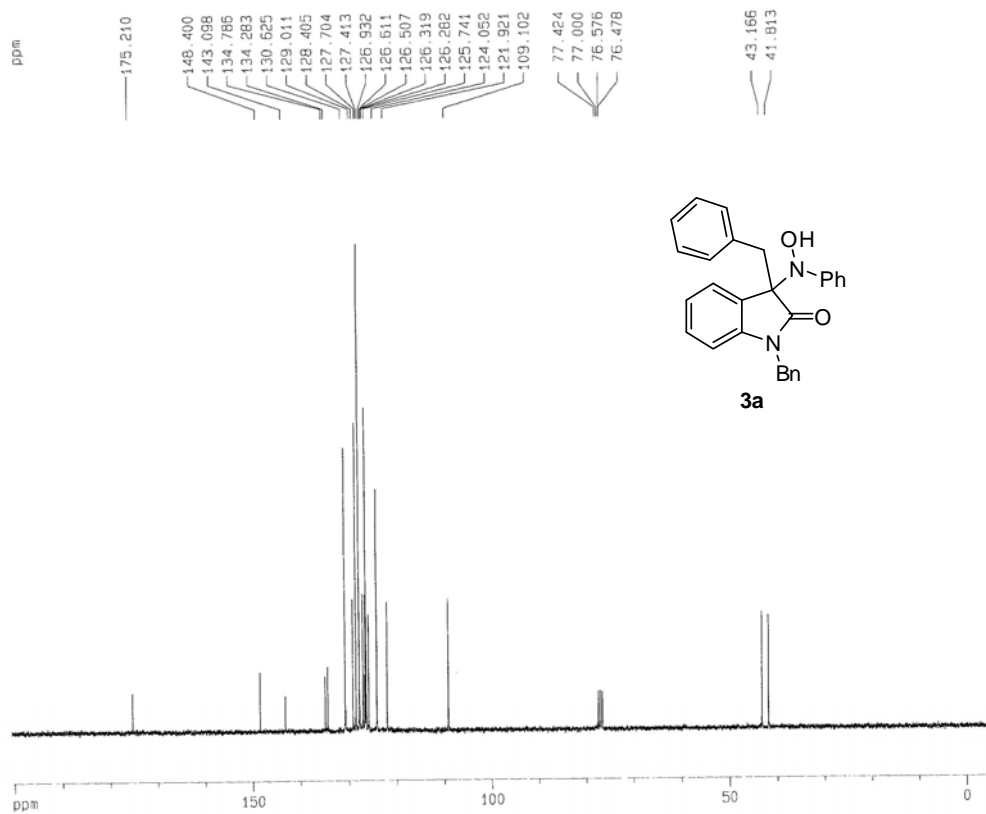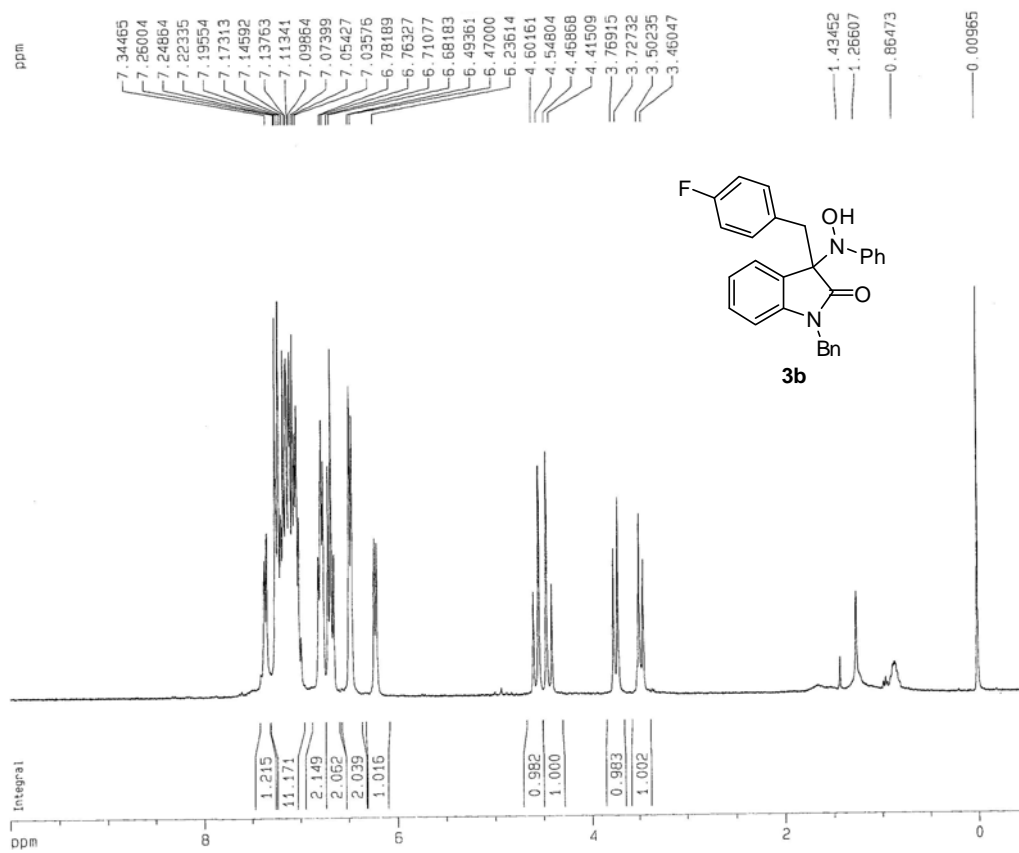



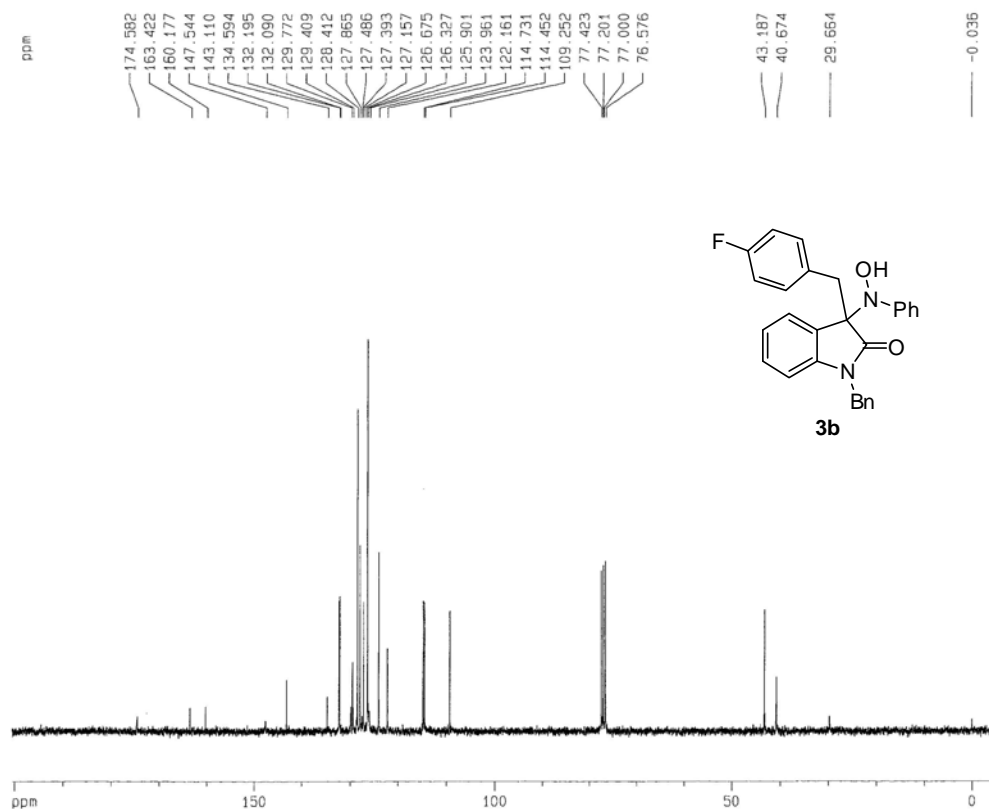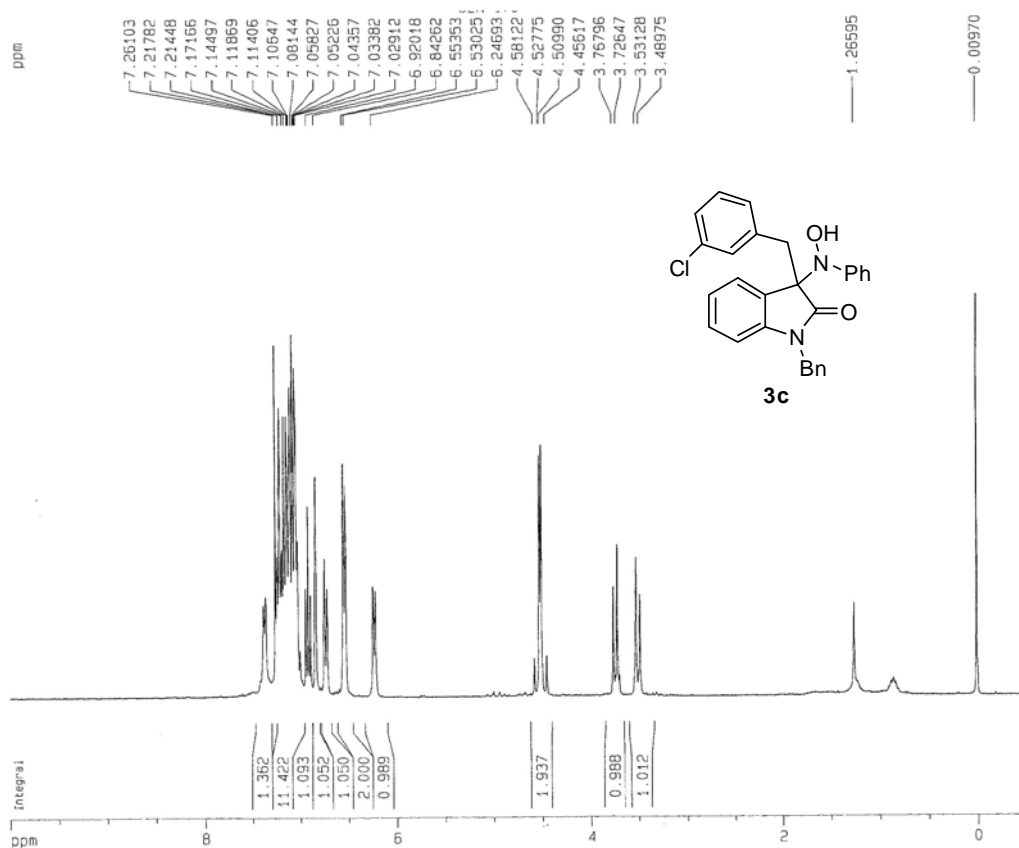

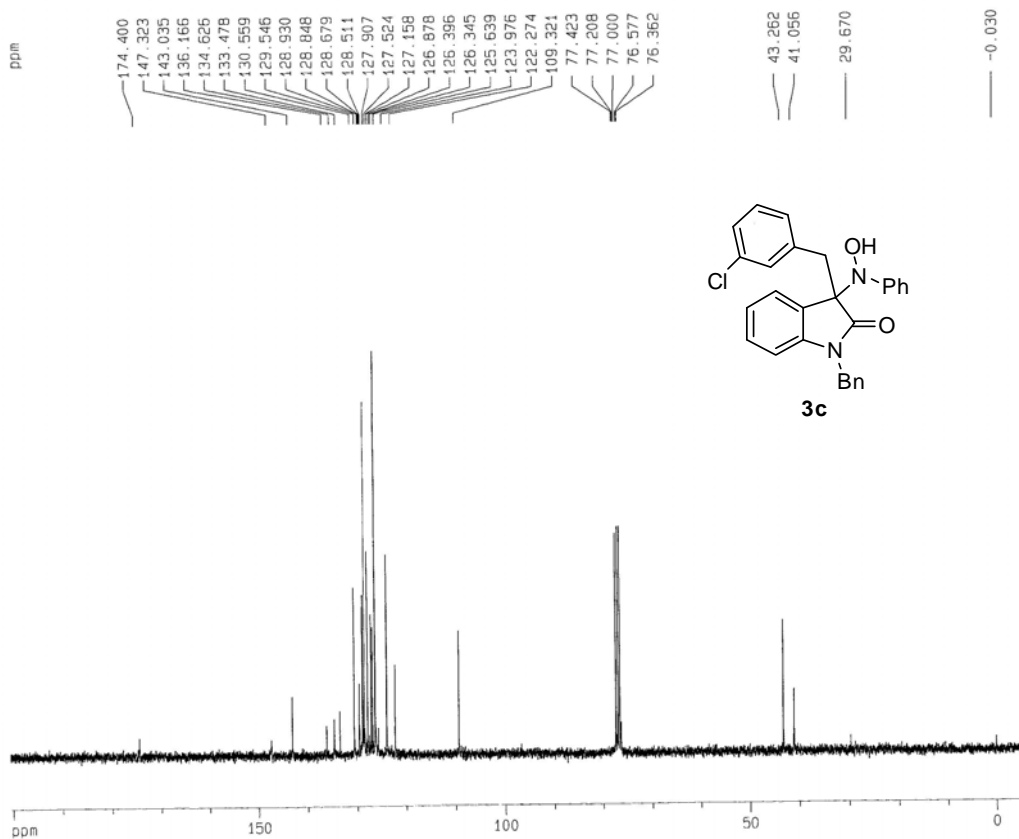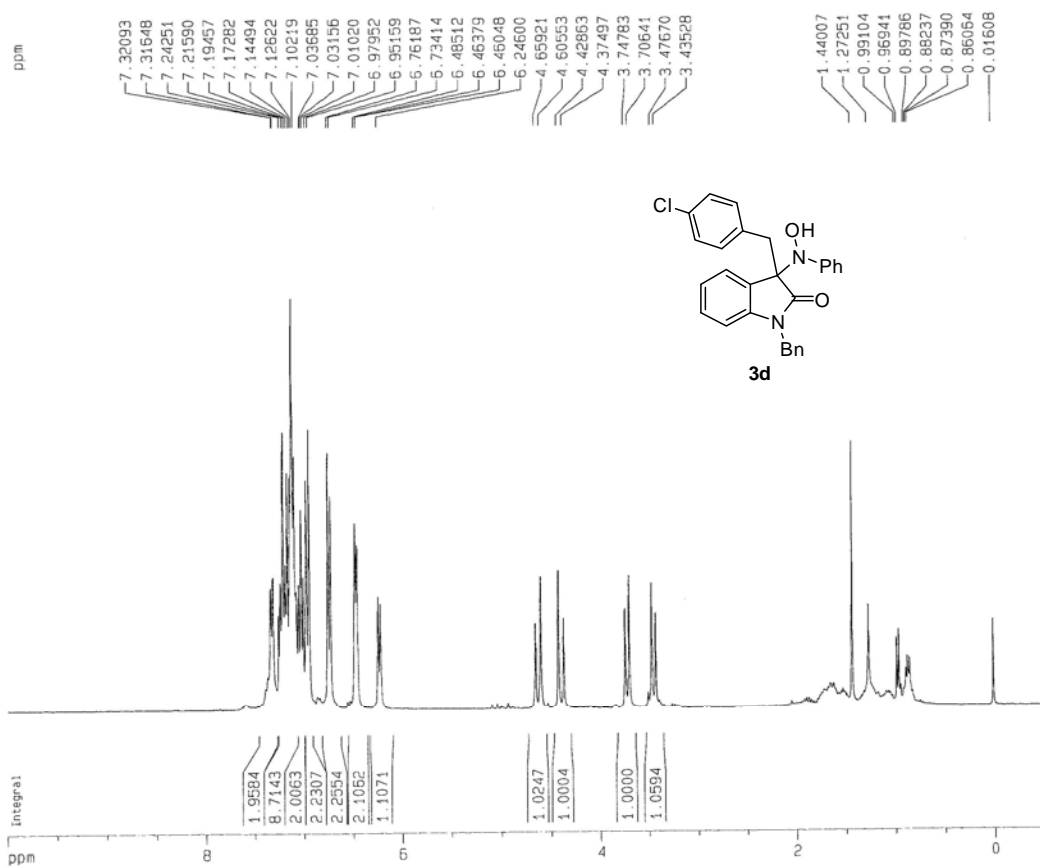

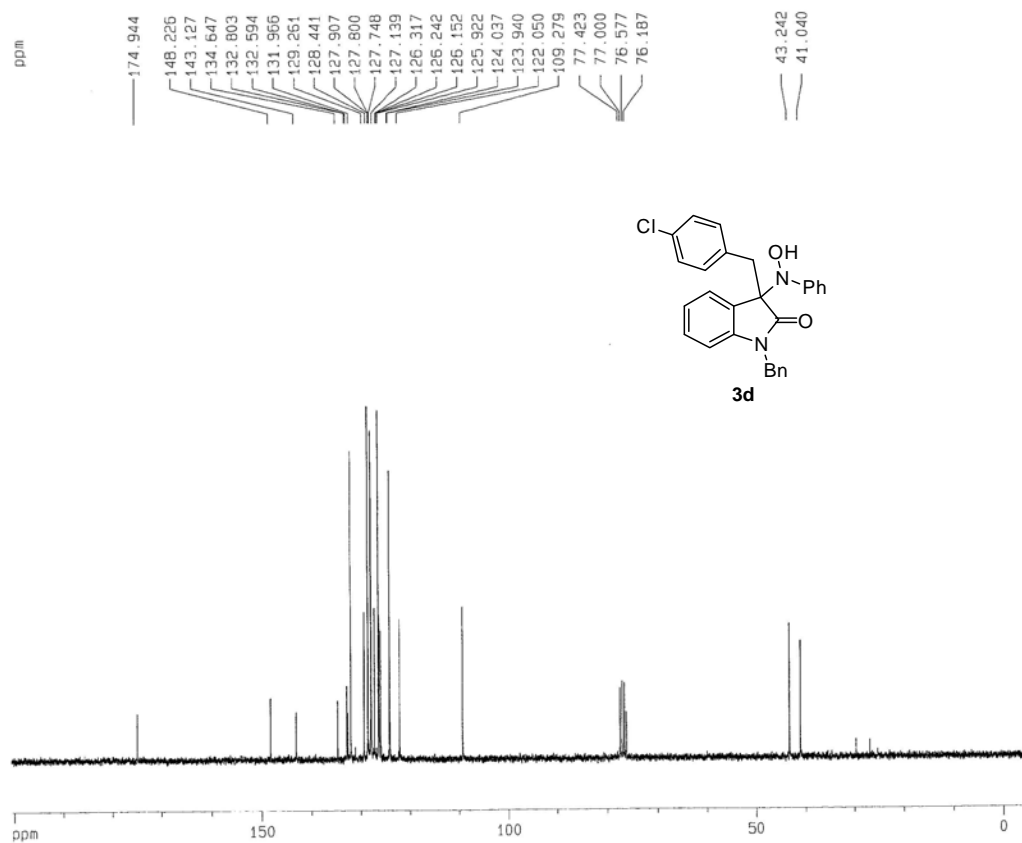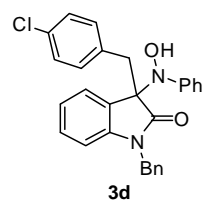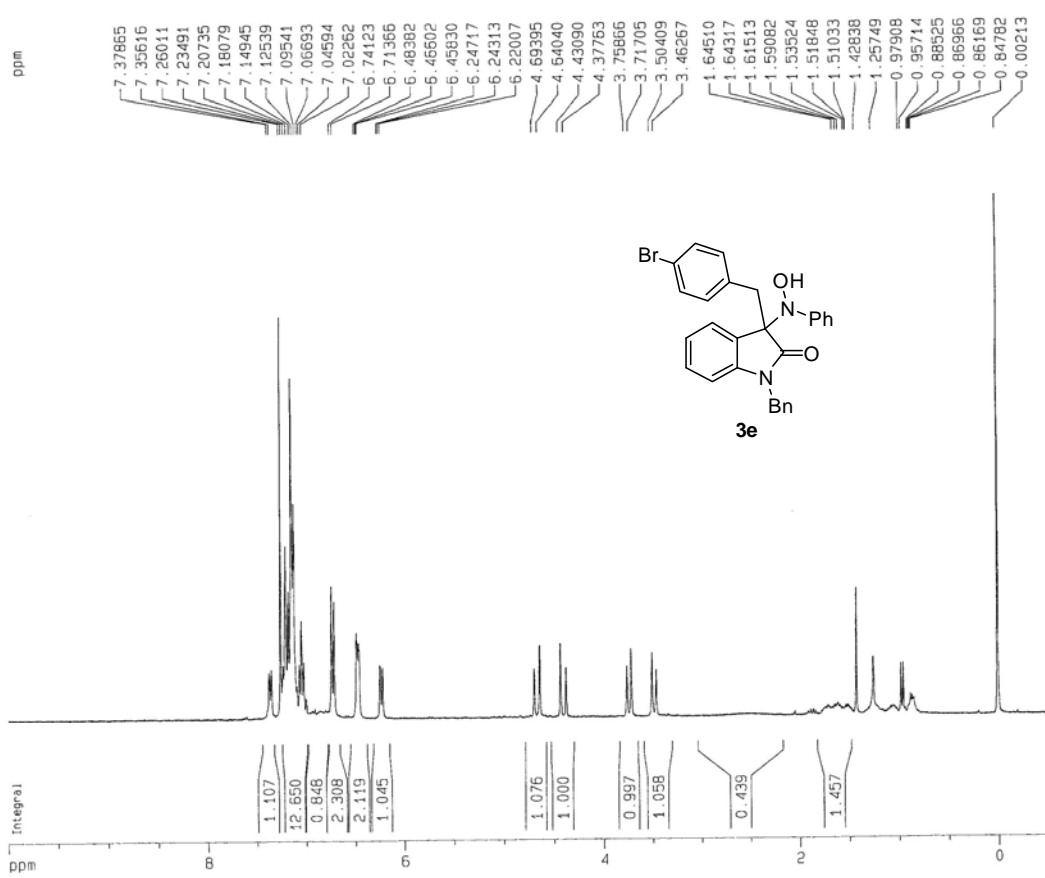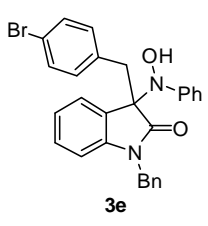

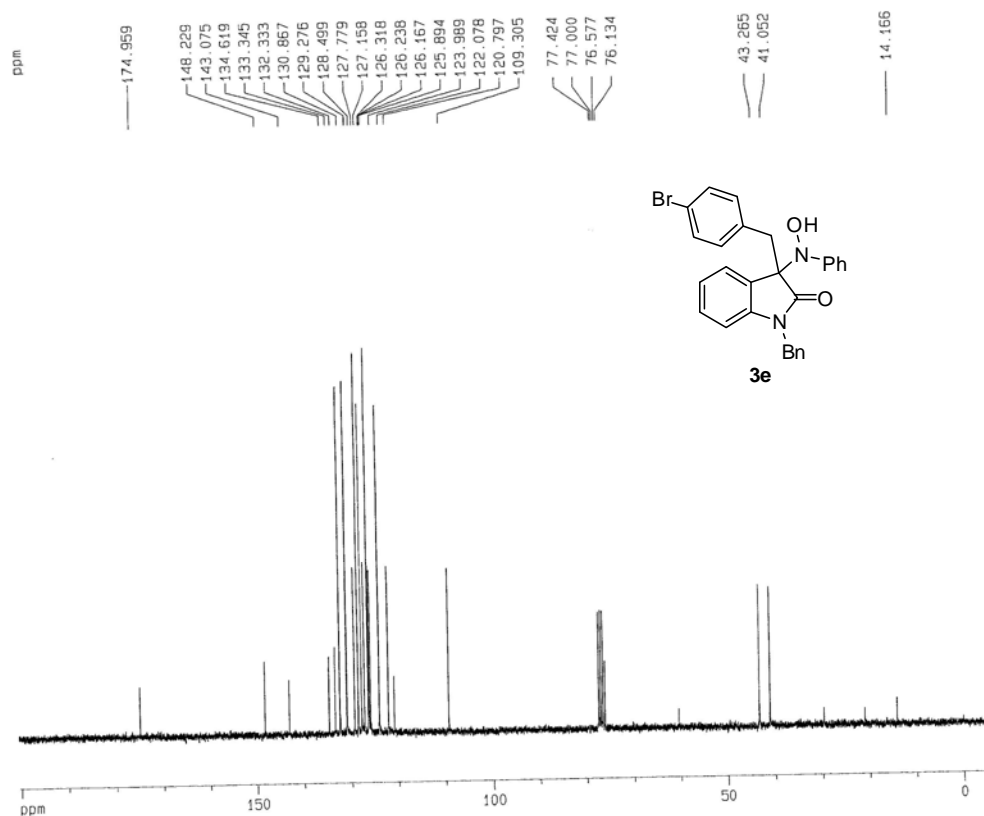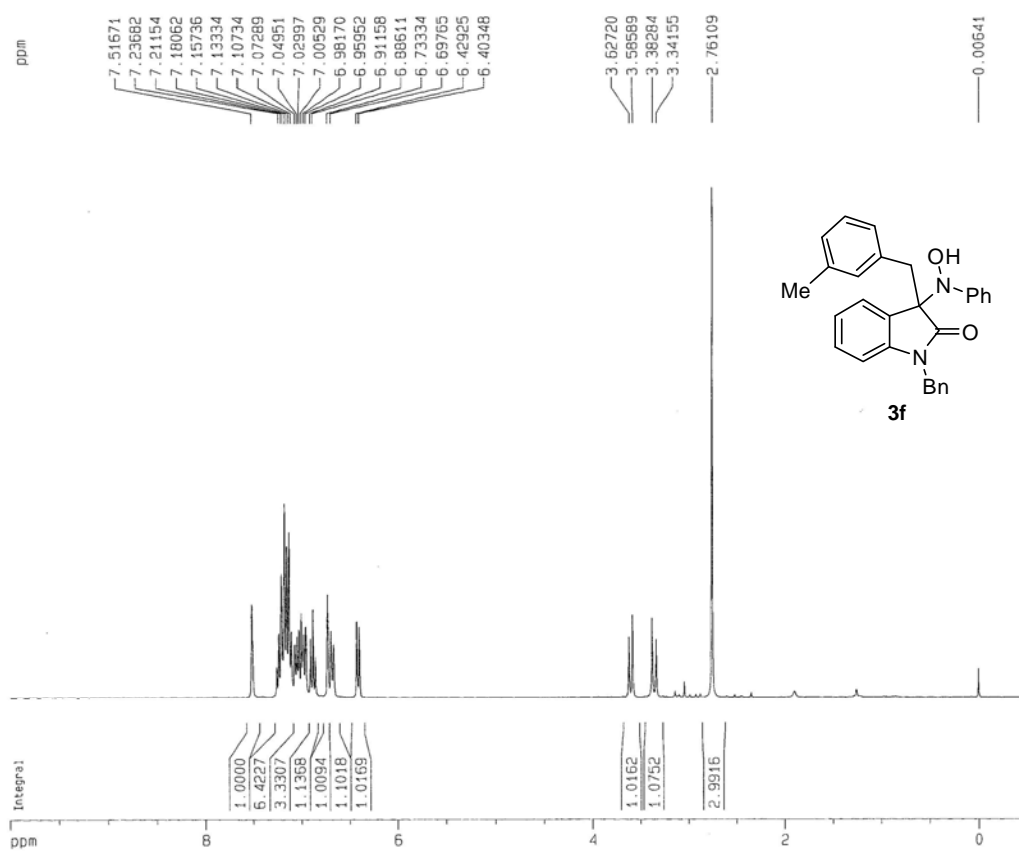

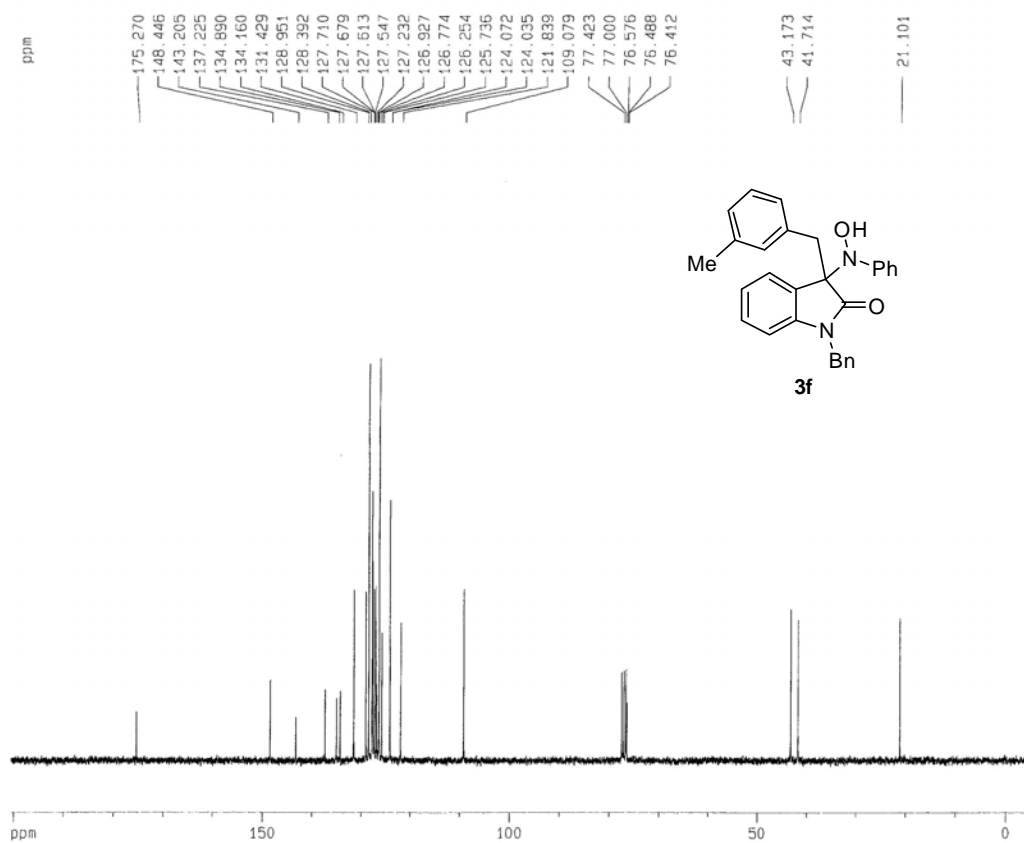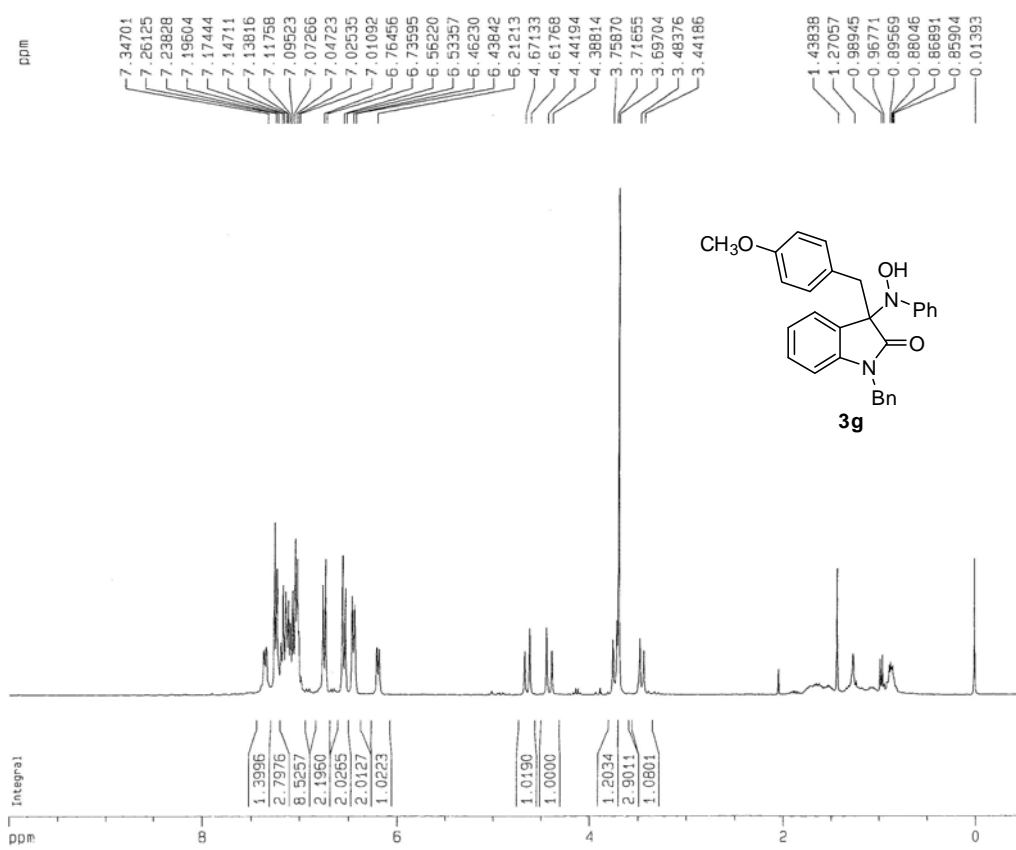

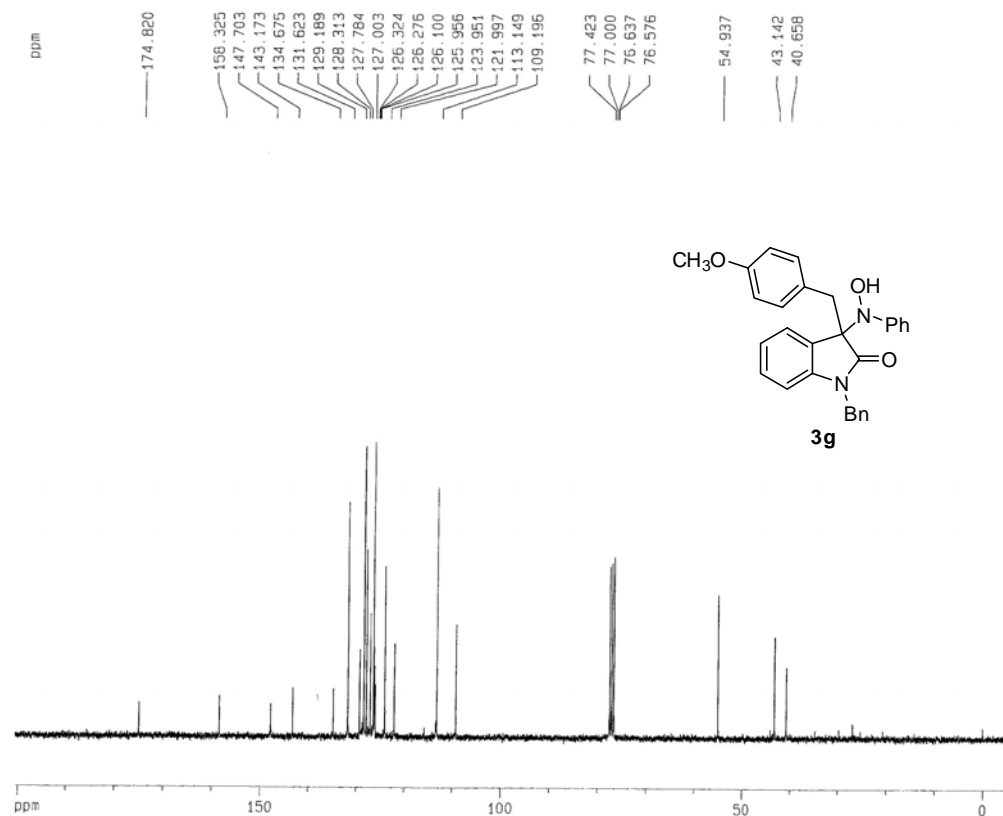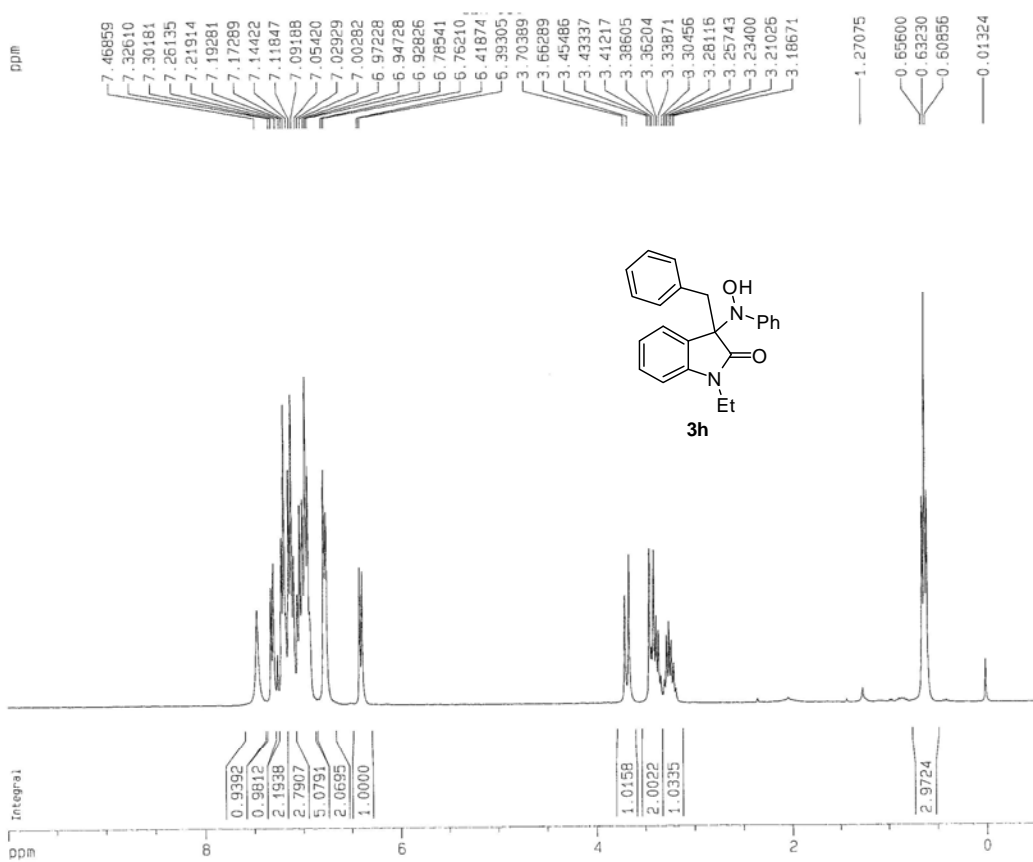

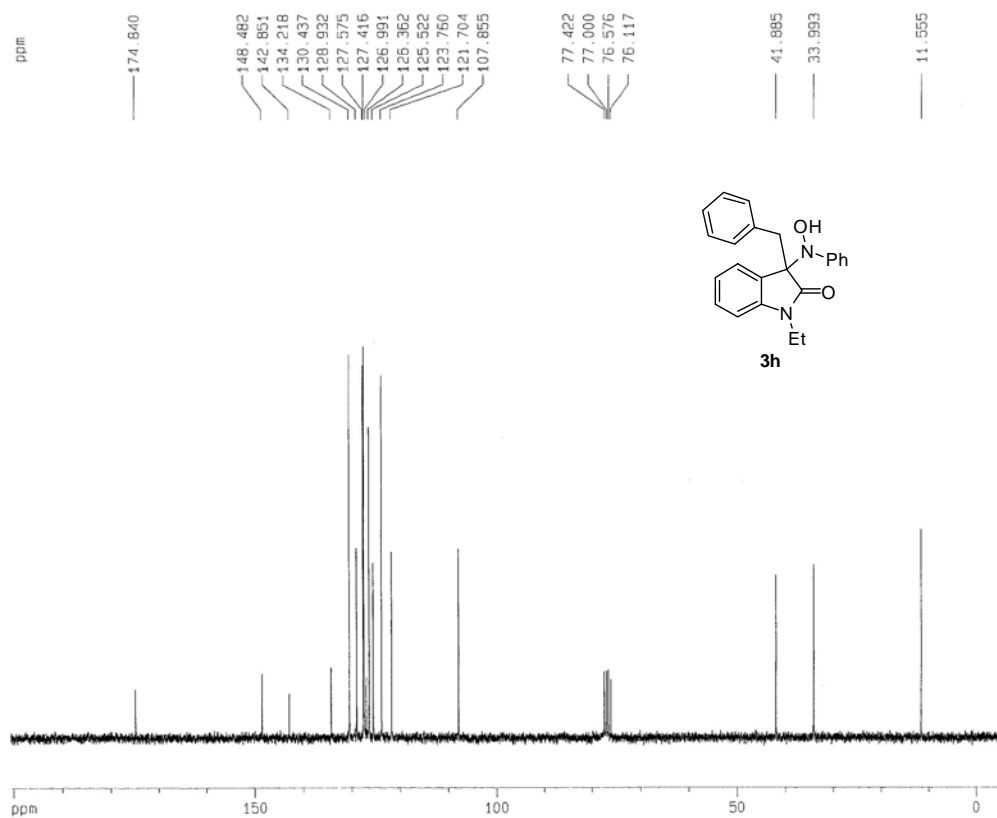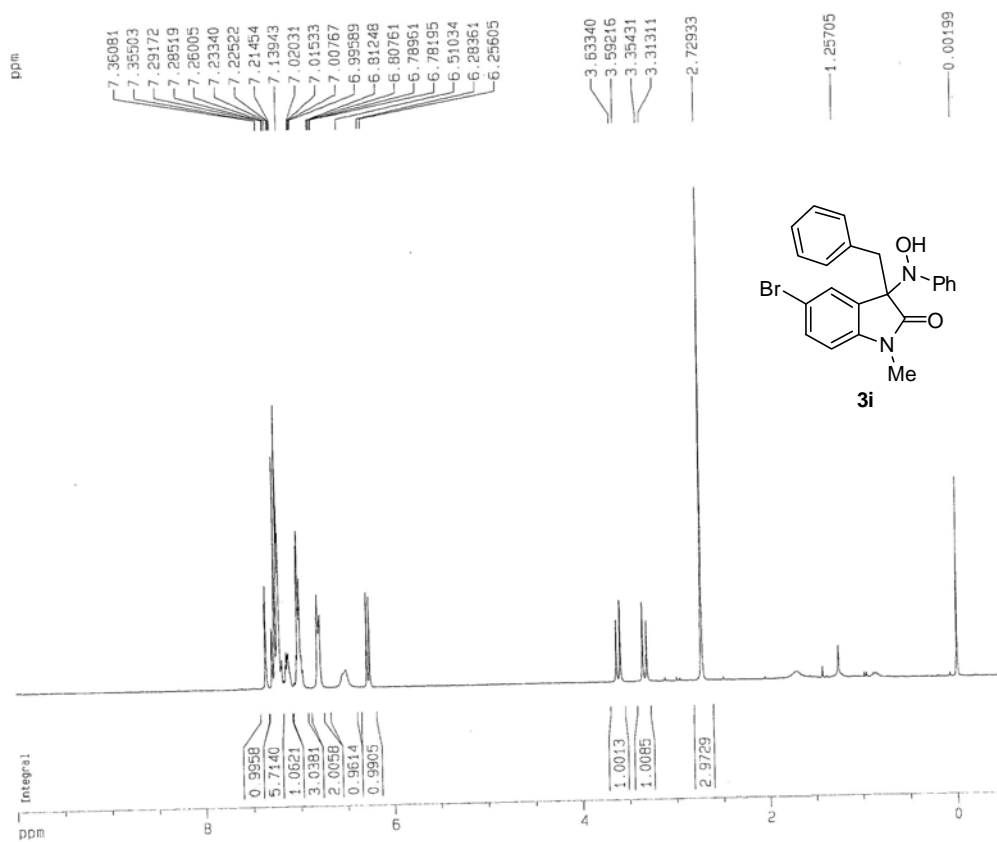

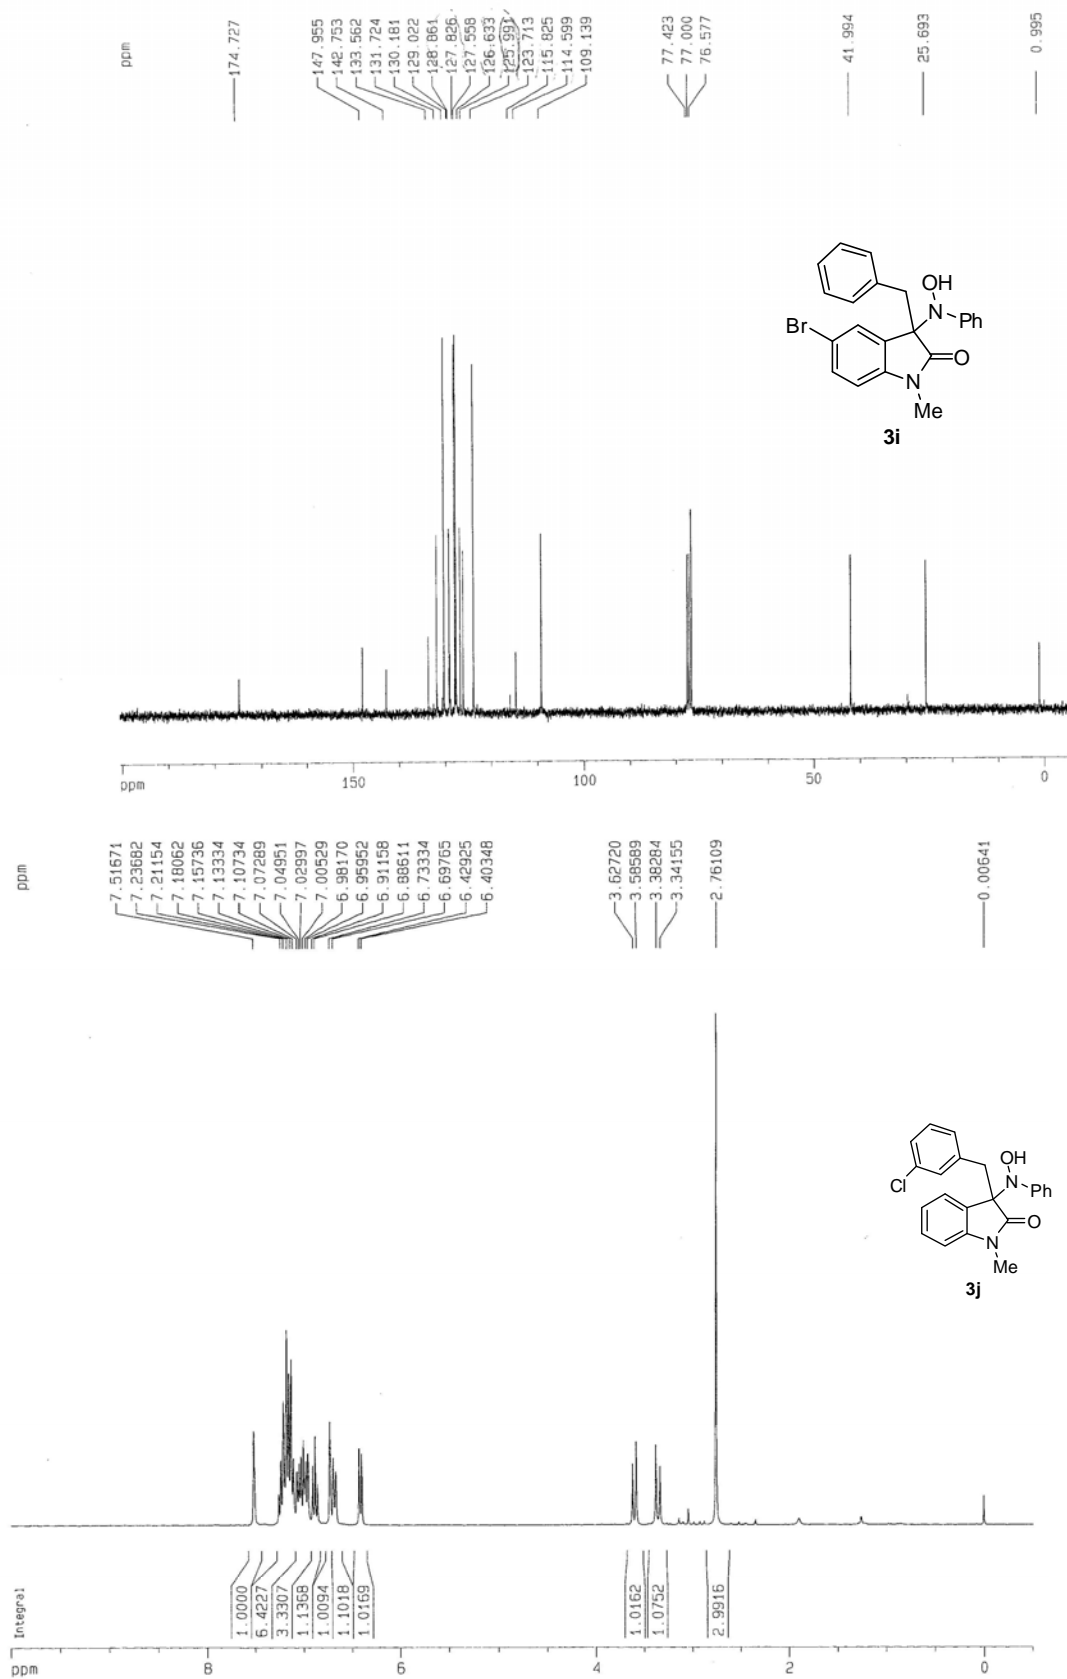



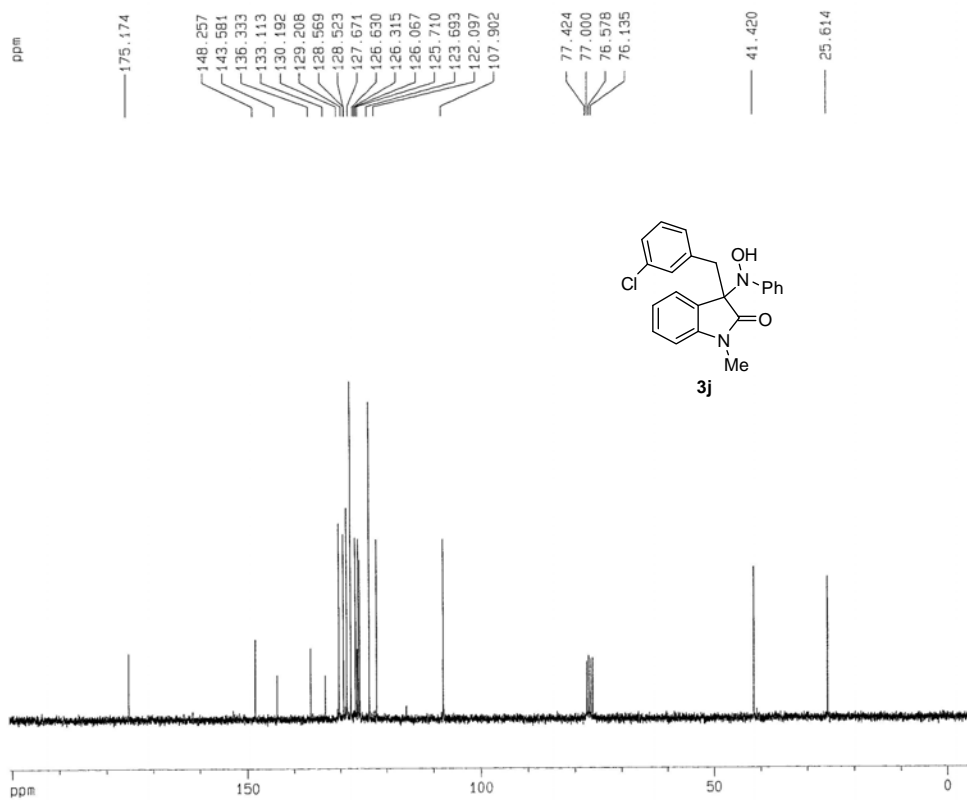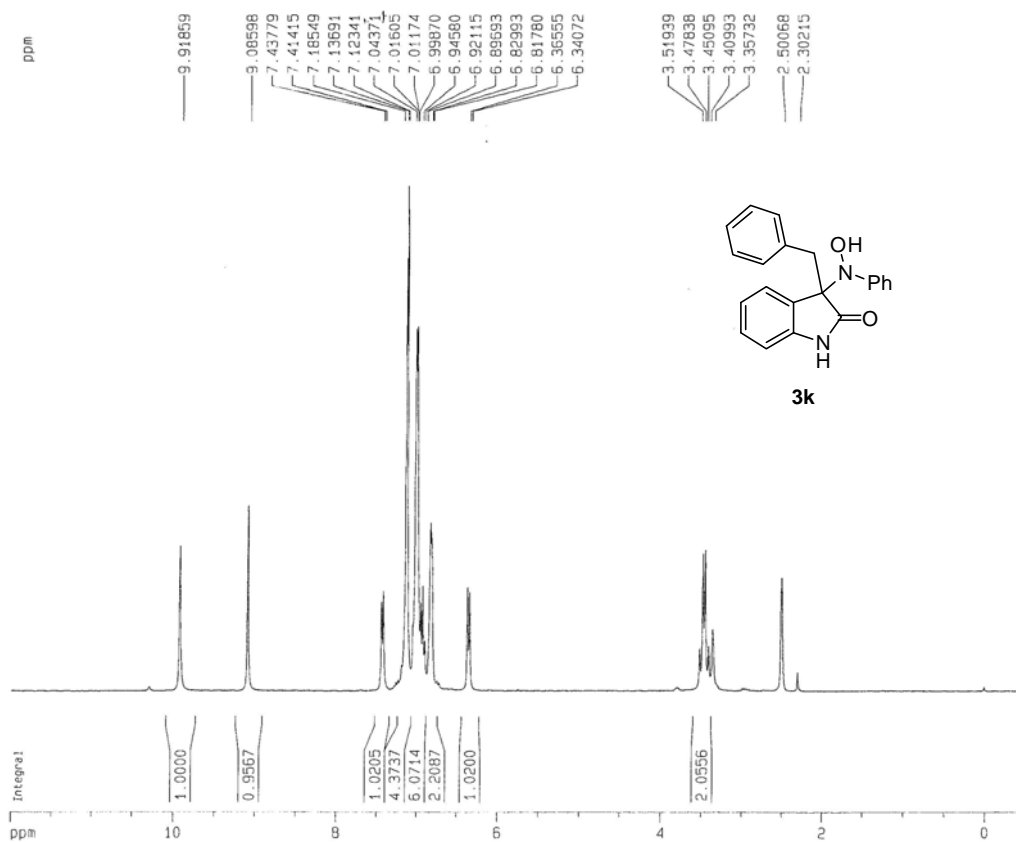

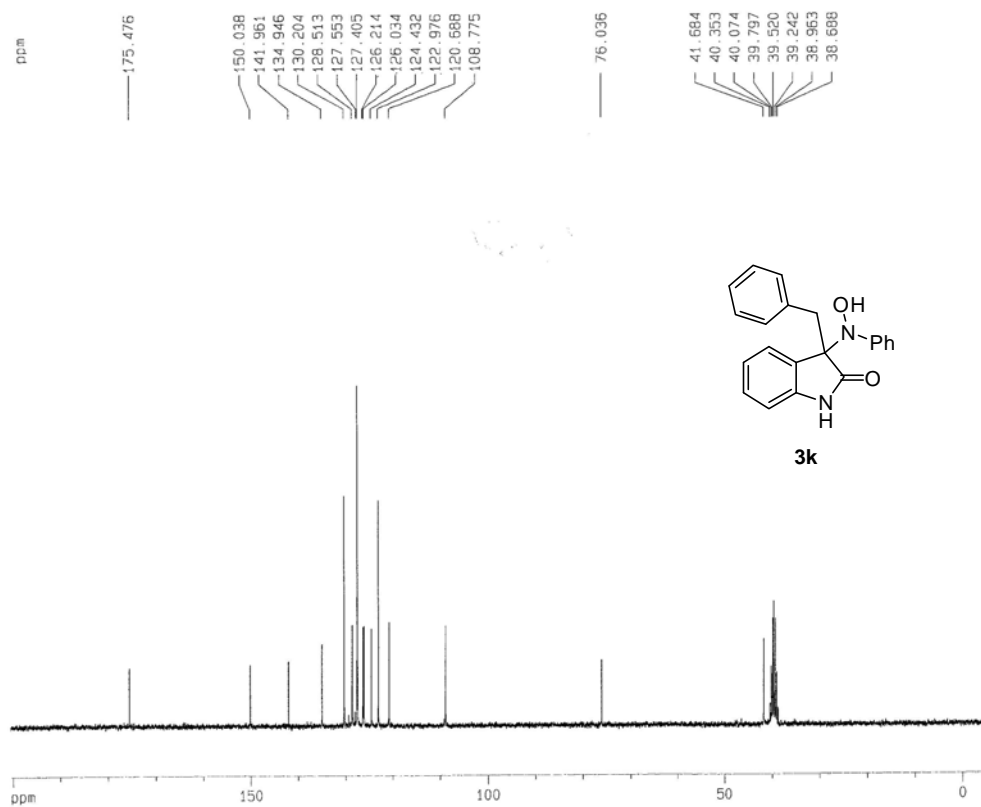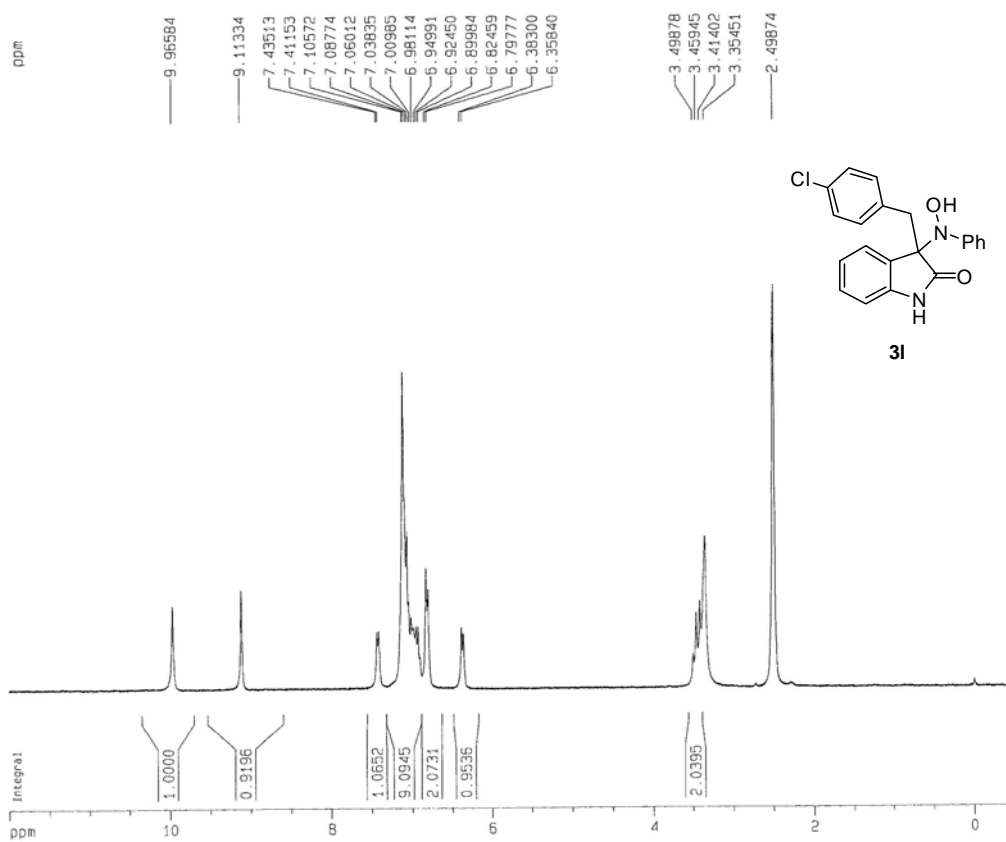

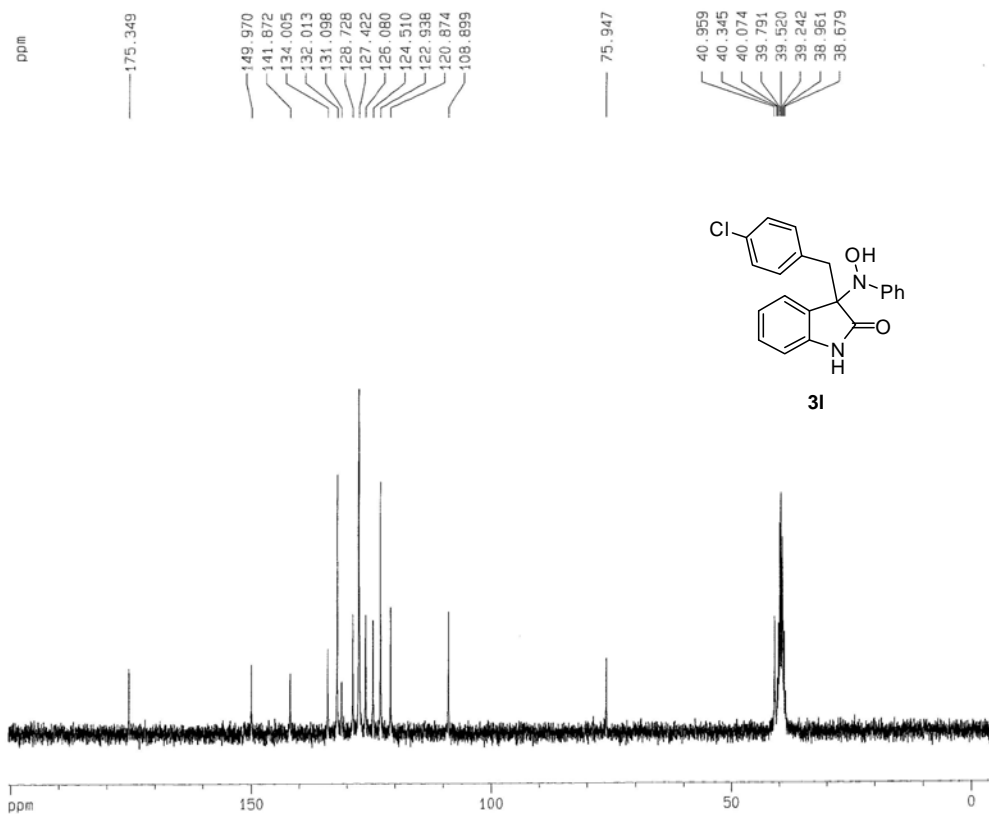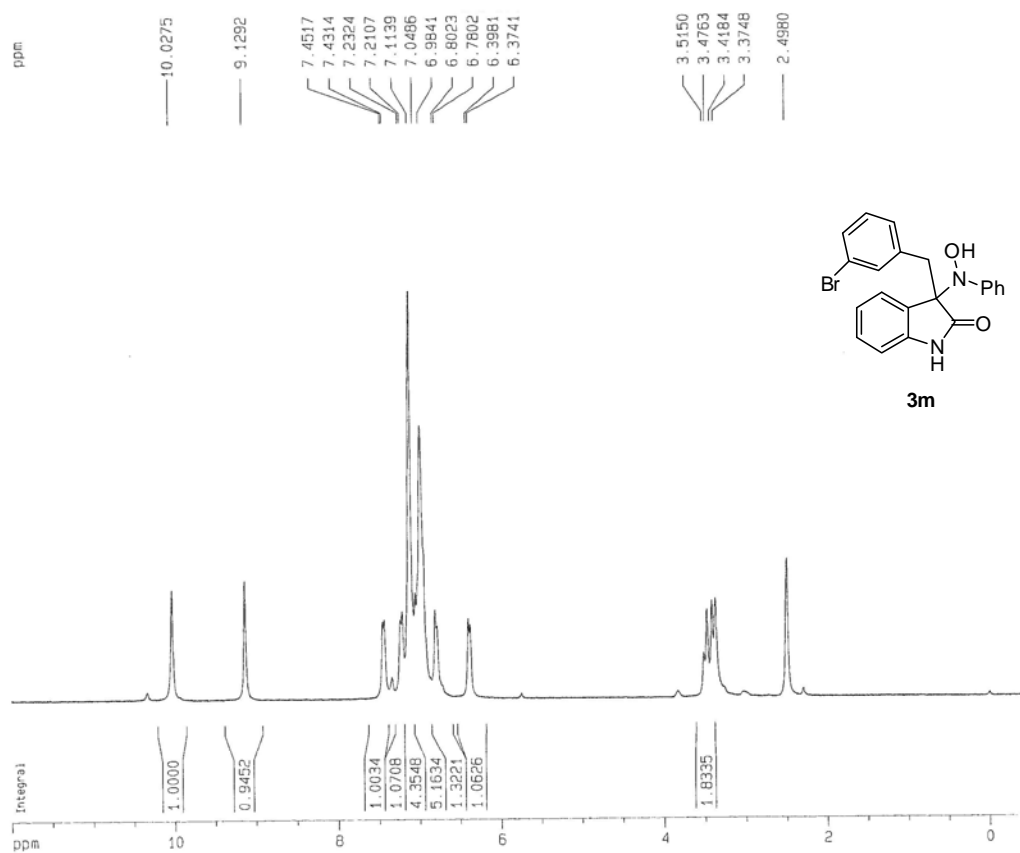

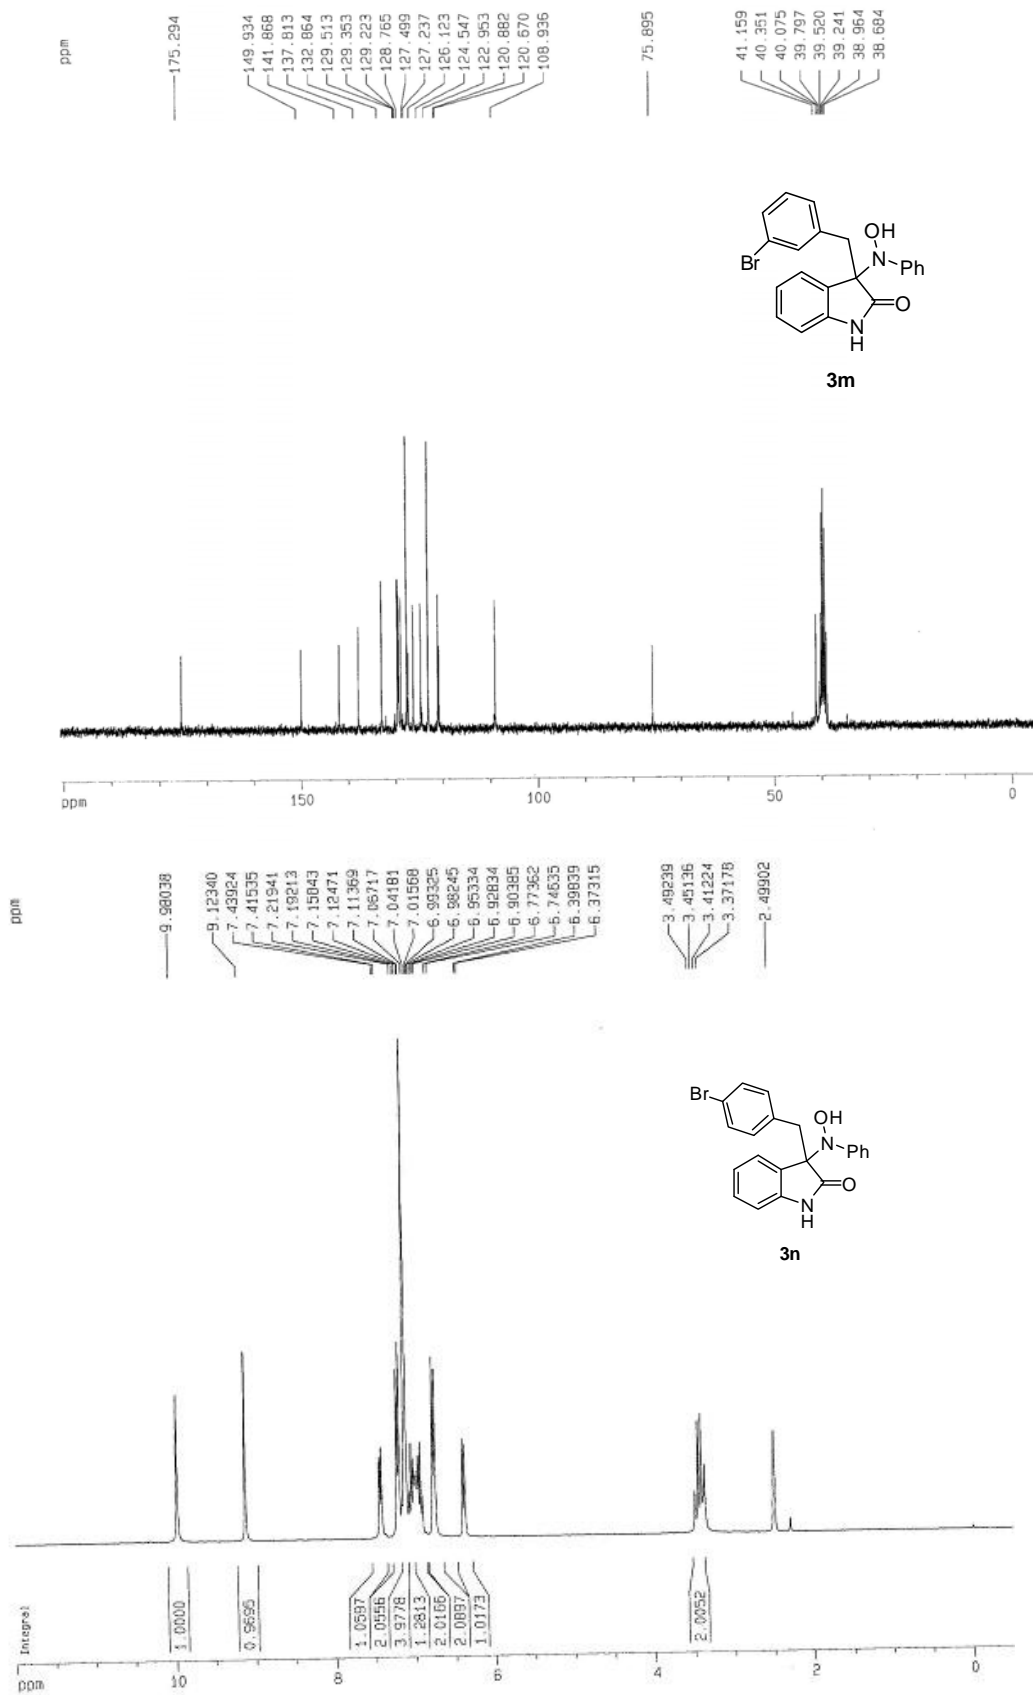

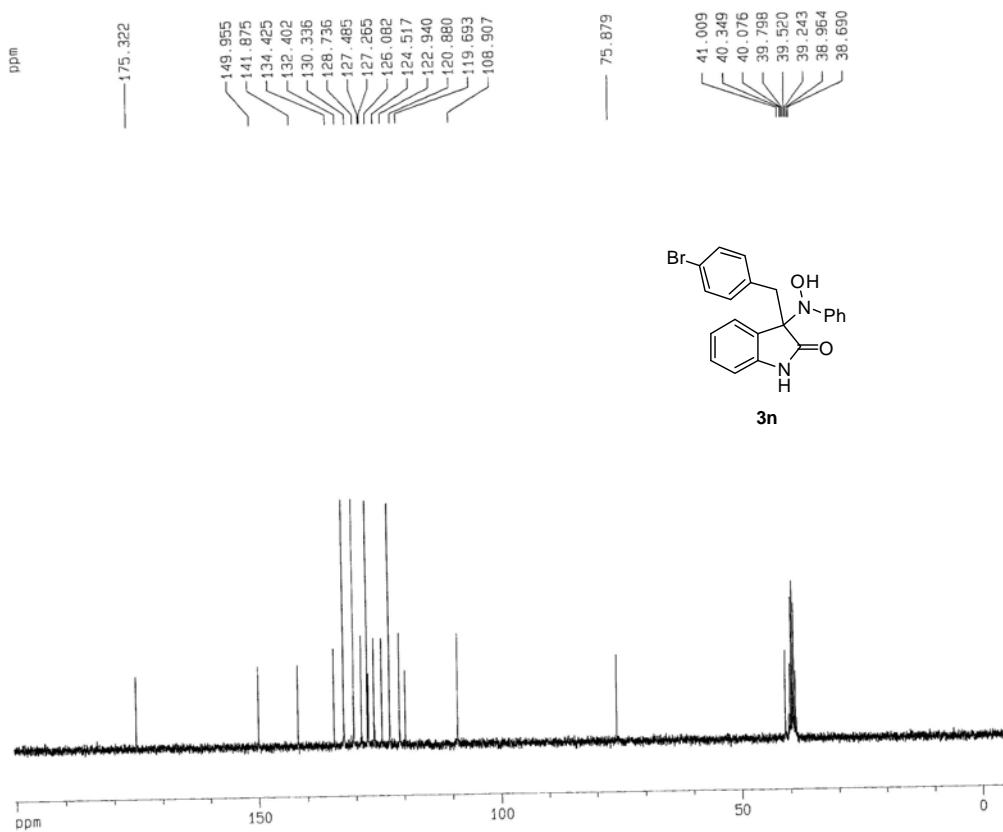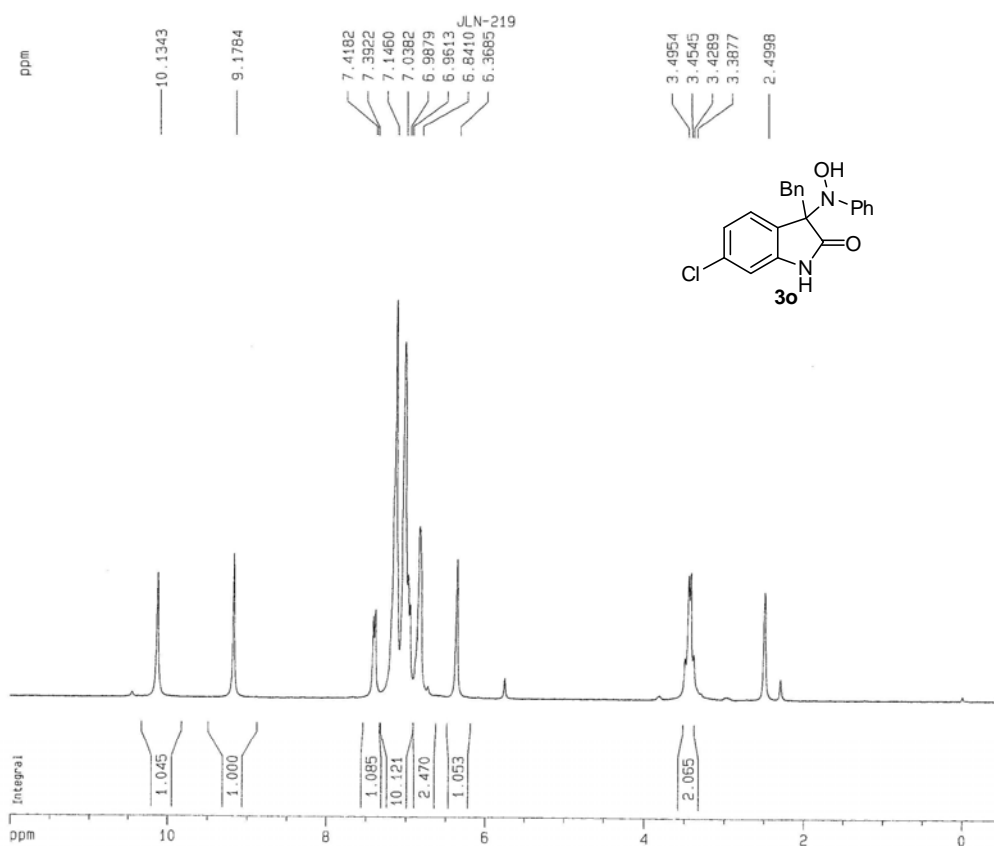

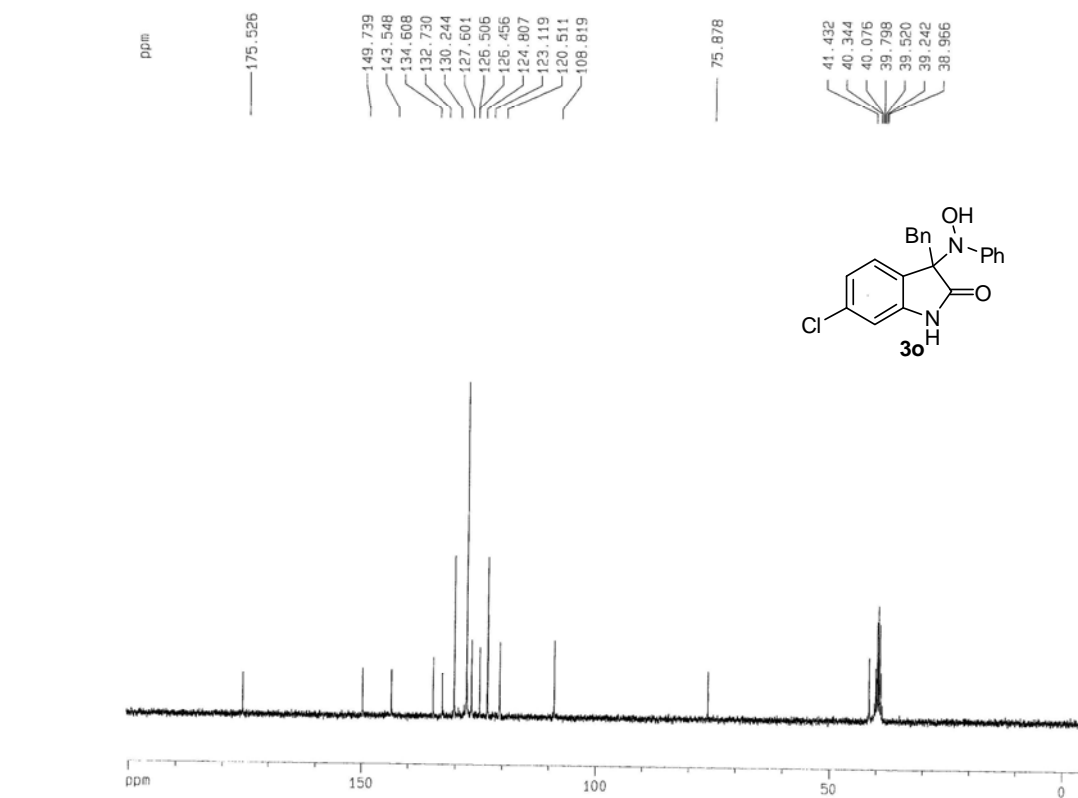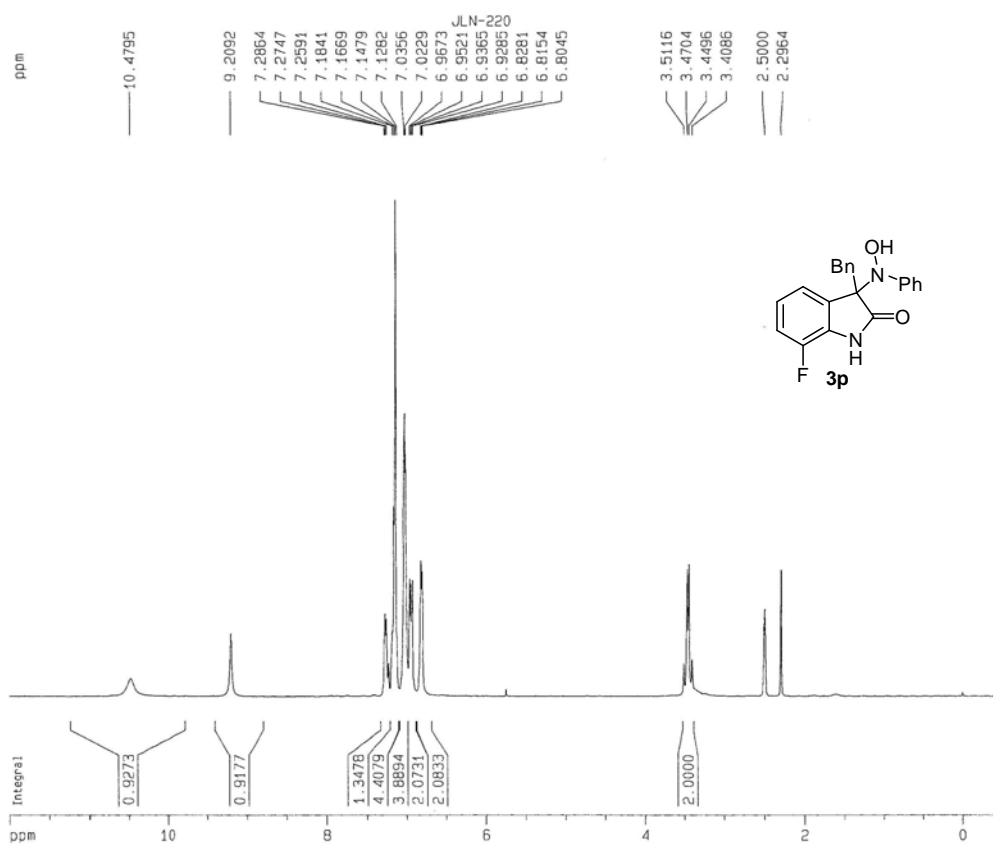

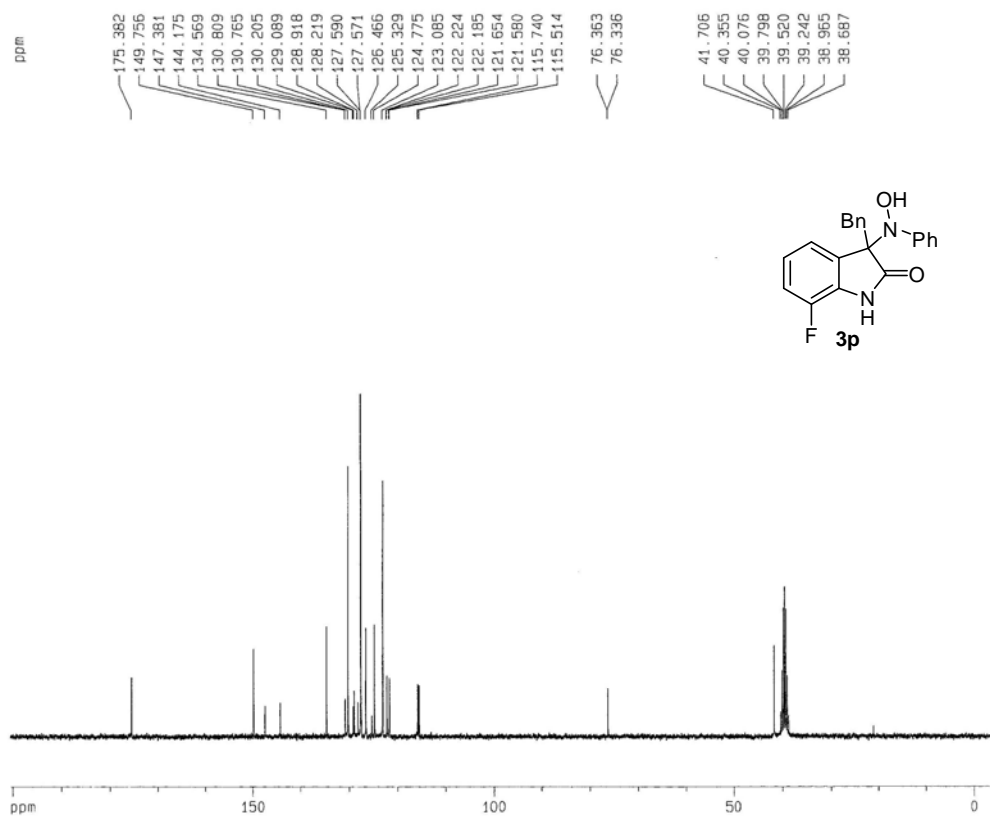

## 6. HPLC chromatograms

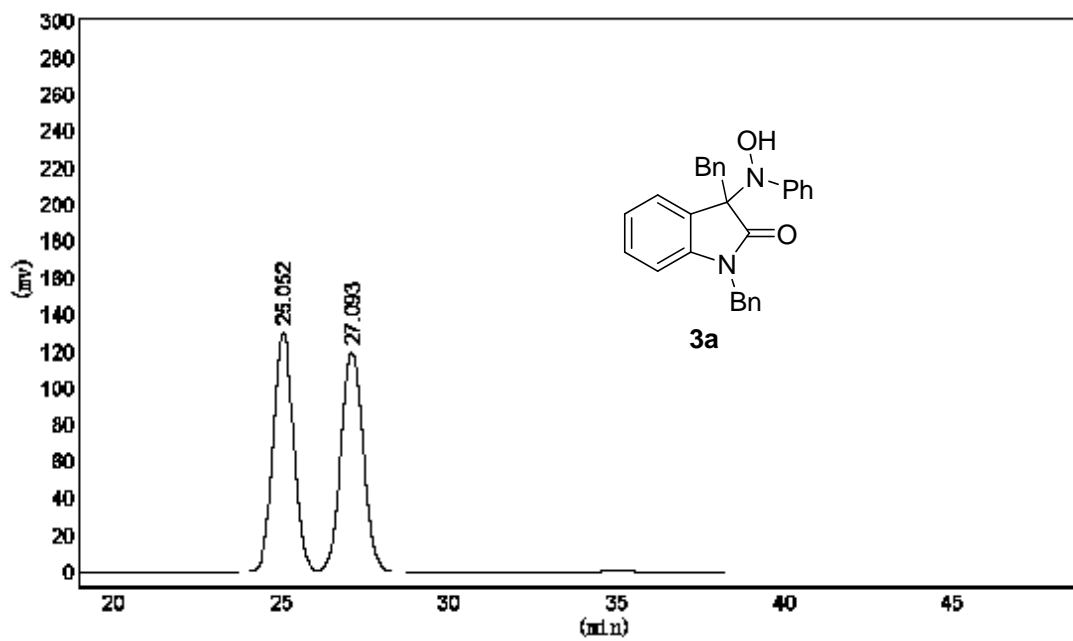

| Peak | RT(min) | Height (mV*sec) | Area (mv)   | Area (%) |
|------|---------|-----------------|-------------|----------|
| 1    | 25.052  | 129893.602      | 5485543.000 | 49.9666  |
| 2    | 27.093  | 118919.102      | 5492882.500 | 50.0334  |

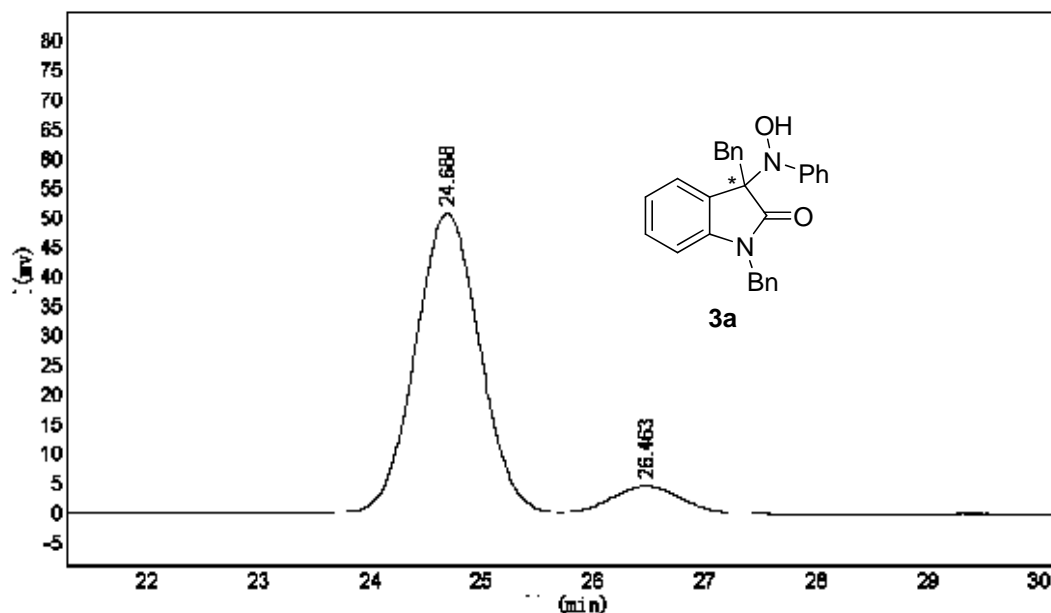

| Peak | RT(min) | Height (mV*sec) | Area (mv)   | Area (%) |
|------|---------|-----------------|-------------|----------|
| 1    | 24.688  | 50691.500       | 2009745.250 | 91.4494  |
| 2    | 26.463  | 4541.935        | 187913.094  | 8.5506   |

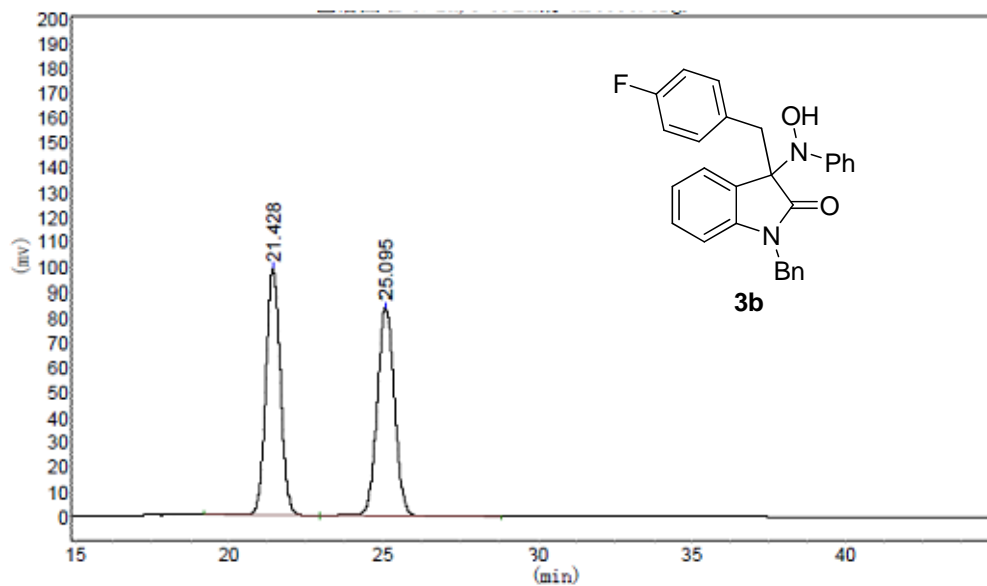

| Peak | RT(min) | Height (mV*sec) | Area (mv)   | Area (%) |
|------|---------|-----------------|-------------|----------|
| 1    | 21.428  | 98929.477       | 3272745.000 | 49.8815  |
| 2    | 25.095  | 84156.602       | 3288291.750 | 50.1185  |



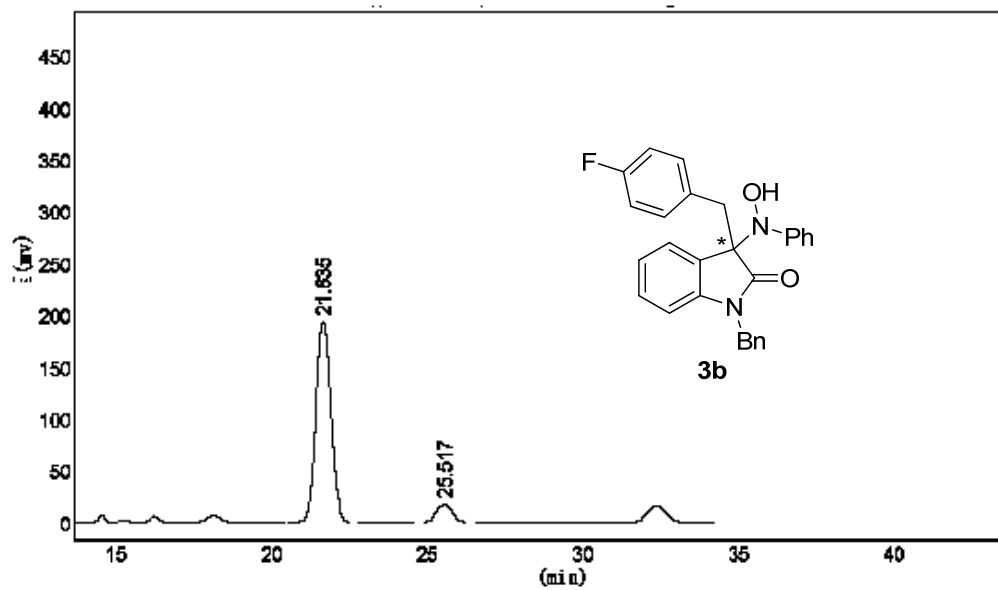

| Peak | RT(min) | Height (mV*sec) | Area (mv)   | Area (%) |
|------|---------|-----------------|-------------|----------|
| 1    | 21.635  | 194533.281      | 6556853.000 | 90.0229  |
| 2    | 25.517  | 18501.555       | 726687.875  | 9.9771   |

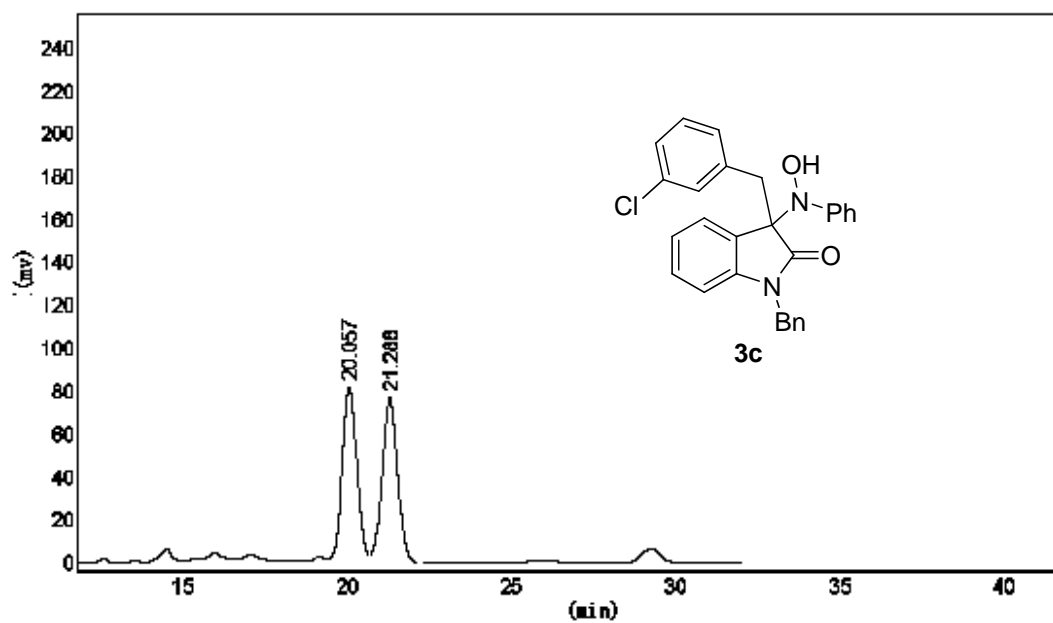

| Peak | RT(min) | Height (mV*sec) | Area (mv)   | Area (%) |
|------|---------|-----------------|-------------|----------|
| 1    | 20.057  | 79198.633       | 2365076.750 | 49.8512  |
| 2    | 21.288  | 74588.977       | 2379194.000 | 50.1488  |

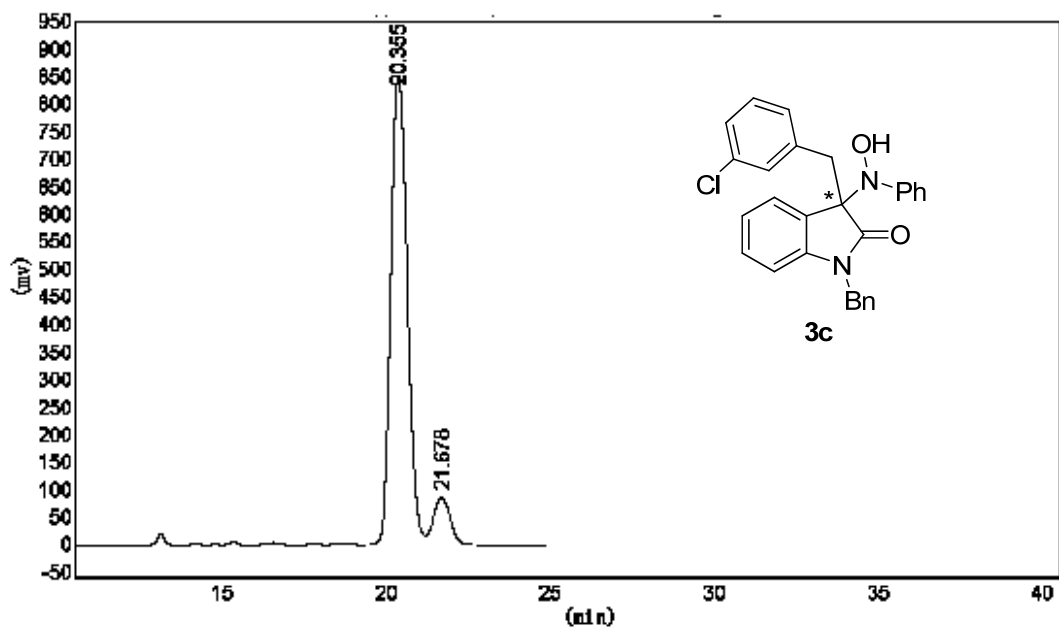

C

| Peak | RT(min) | Height (mV*sec) | Area (mv)    | Area (%) |
|------|---------|-----------------|--------------|----------|
| 1    | 20.355  | 850176.125      | 29464098.000 | 90.6298  |
| 2    | 21.678  | 85257.508       | 3046305.500  | 9.3702   |

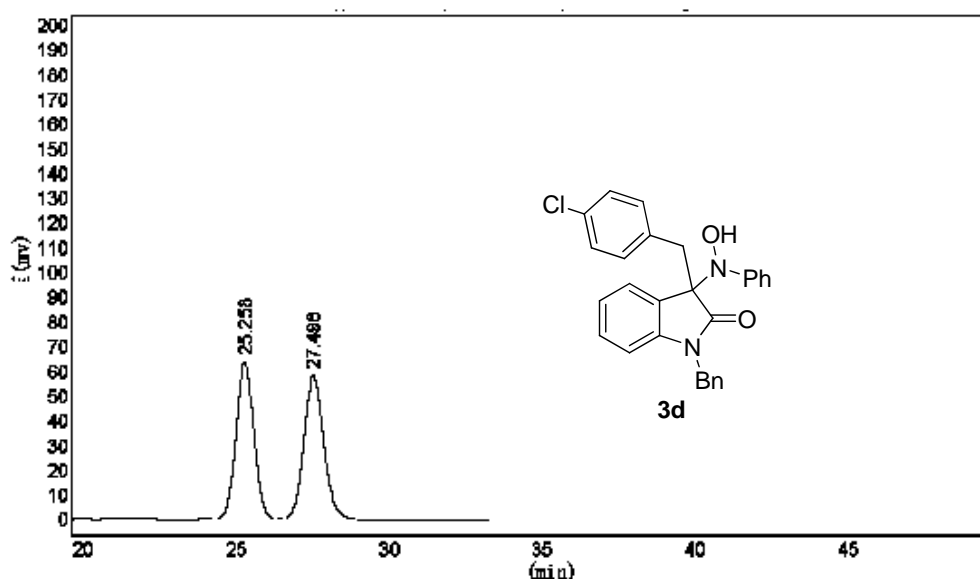

C

| Peak | RT(min) | Height (mV*sec) | Area (mv)   | Area (%) |
|------|---------|-----------------|-------------|----------|
| 1    | 25.258  | 63639.457       | 2567564.250 | 49.3016  |
| 2    | 27.498  | 58085.191       | 2640308.500 | 50.6984  |

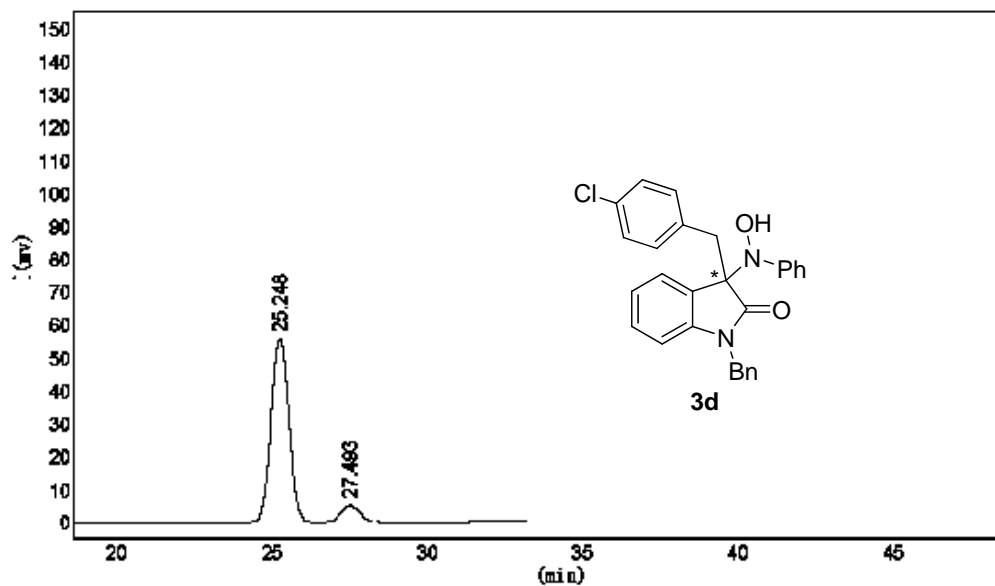

| Peak | RT(min) | Height (mV*sec) | Area (mv)   | Area (%) |
|------|---------|-----------------|-------------|----------|
| 1    | 25.248  | 55853.023       | 2238038.250 | 90.8797  |
| 2    | 27.493  | 5241.358        | 224599.984  | 9.1203   |

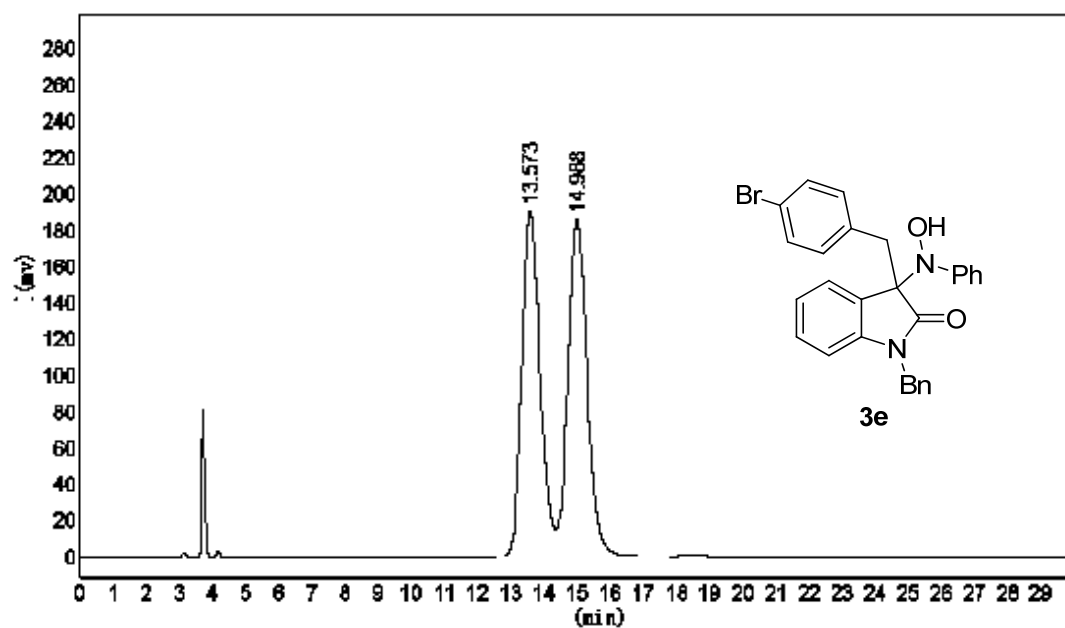

| Peak | RT(min) | Height (mV*sec) | Area (mv)   | Area (%) |
|------|---------|-----------------|-------------|----------|
| 1    | 13.573  | 190267.891      | 7249819.000 | 49.2460  |
| 2    | 14.988  | 185583.219      | 7471822.000 | 50.7540  |

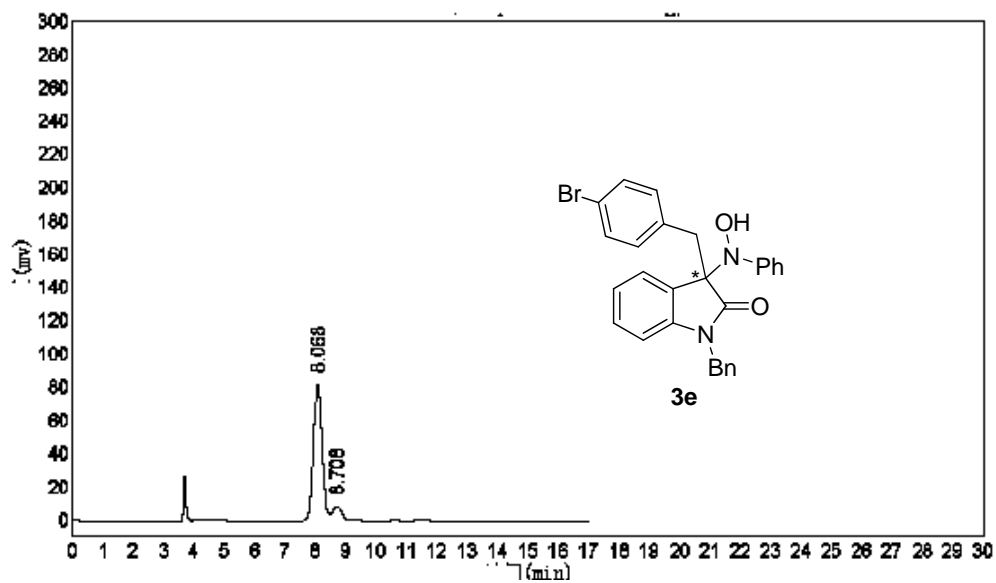

| Peak | RT(min) | Height (mV*sec) | Area (mv)   | Area (%) |
|------|---------|-----------------|-------------|----------|
| 1    | 8.068   | 82317.703       | 1592853.500 | 90.0175  |
| 2    | 8.708   | 8866.564        | 176638.750  | 9.9825   |

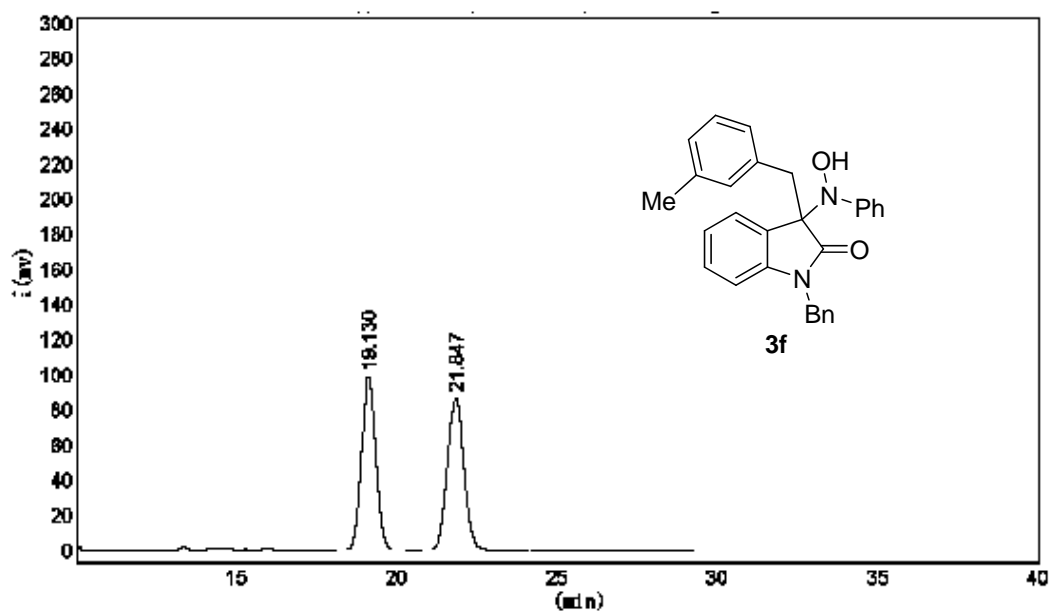

| Peak | RT(min) | Height (mV*sec) | Area (mv)   | Area (%) |
|------|---------|-----------------|-------------|----------|
| 1    | 19.130  | 98693.656       | 3111489.500 | 49.4147  |
| 2    | 21.847  | 86421.984       | 3185192.750 | 50.5853  |

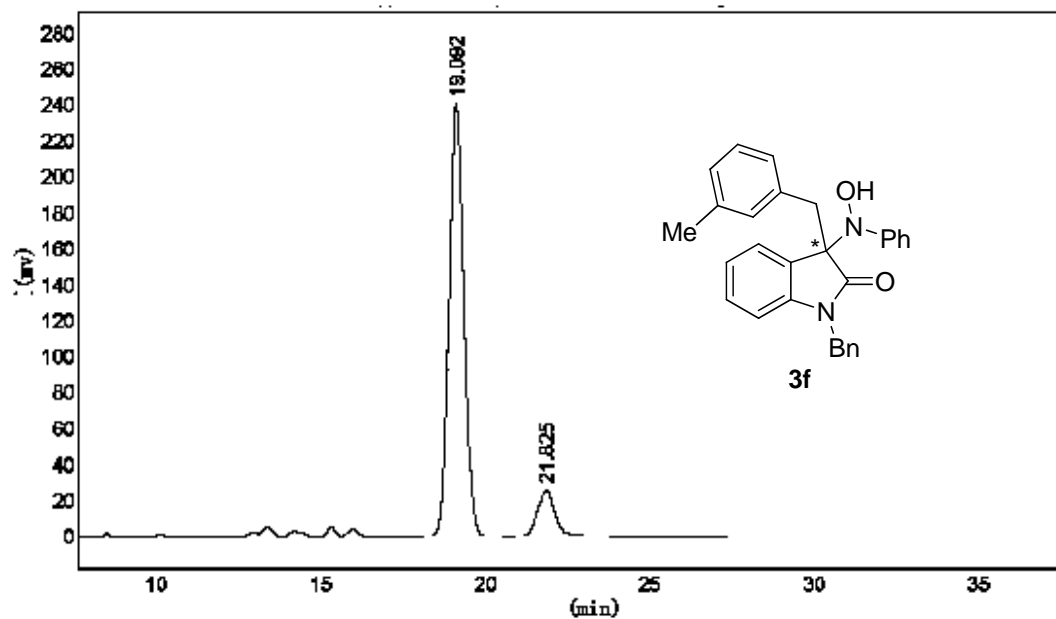

| Peak | RT(min) | Height (mV*sec) | Area (mv)   | Area (%) |
|------|---------|-----------------|-------------|----------|
| 1    | 19.092  | 240699.344      | 7634962.500 | 88.5298  |
| 2    | 21.825  | 25650.889       | 989207.125  | 11.4702  |

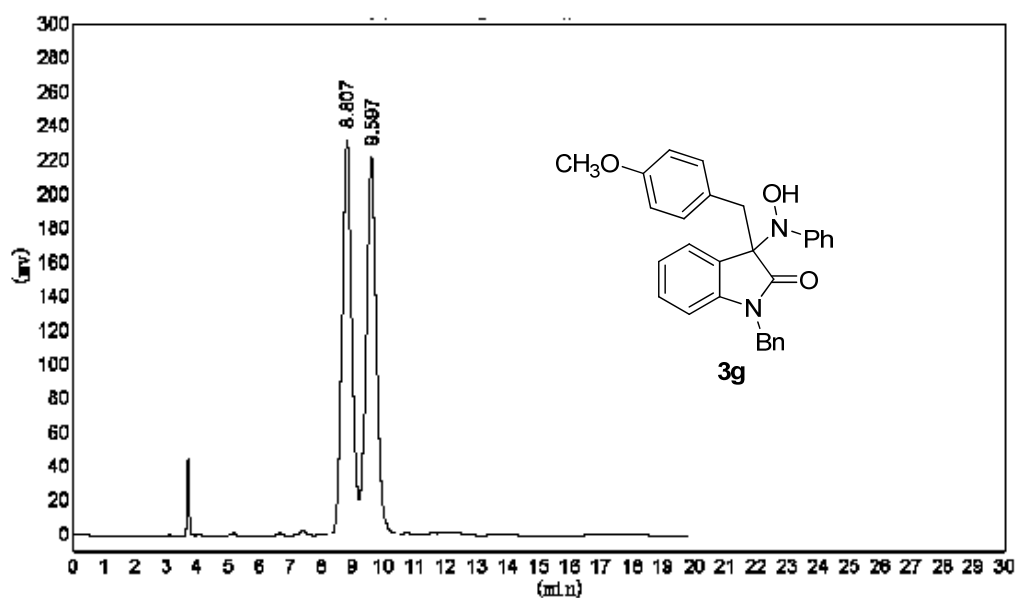

| Peak | RT(min) | Height (mV*sec) | Area (mv)   | Area (%) |
|------|---------|-----------------|-------------|----------|
| 1    | 8.807   | 231549.938      | 5131710.000 | 49.6916  |
| 2    | 9.597   | 220645.313      | 5195408.000 | 50.3084  |

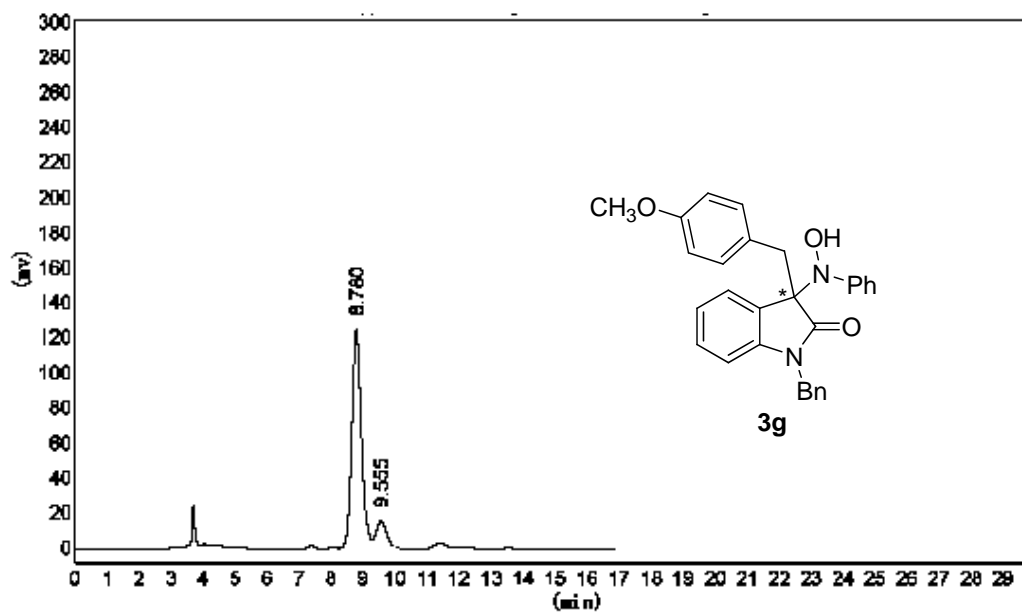

| Peak | RT(min) | Height (mV*sec) | Area (mv)   | Area (%) |
|------|---------|-----------------|-------------|----------|
| 1    | 8.780   | 125378.000      | 2701510.750 | 88.5159  |
| 2    | 9.555   | 15626.189       | 350493.875  | 11.4841  |

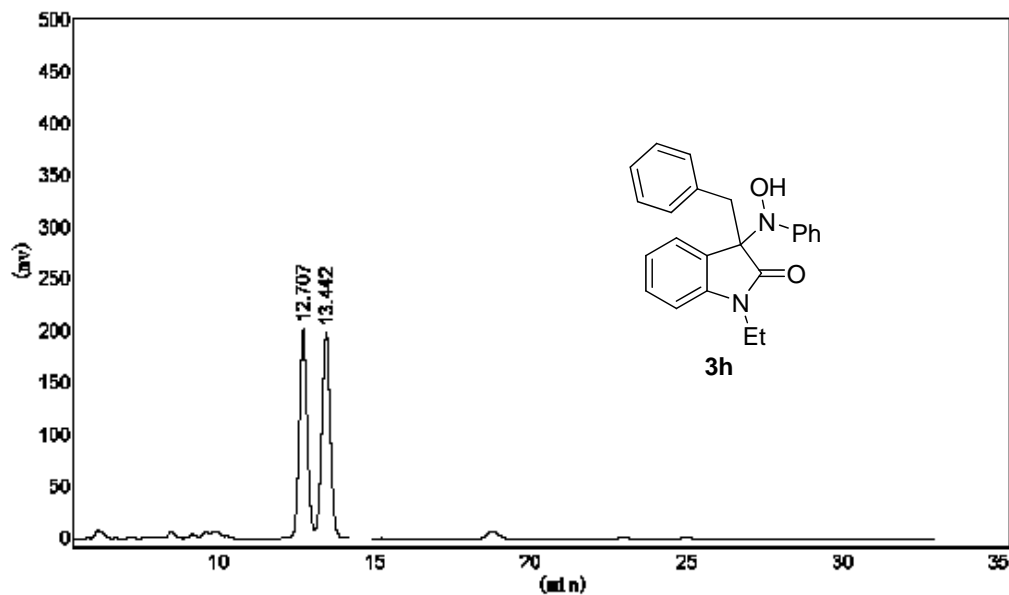

| Peak | RT(min) | Height (mV*sec) | Area (mv)   | Area (%) |
|------|---------|-----------------|-------------|----------|
| 1    | 12.707  | 202063.250      | 3758233.500 | 48.7530  |
| 2    | 13.442  | 198124.719      | 3950481.500 | 51.2470  |

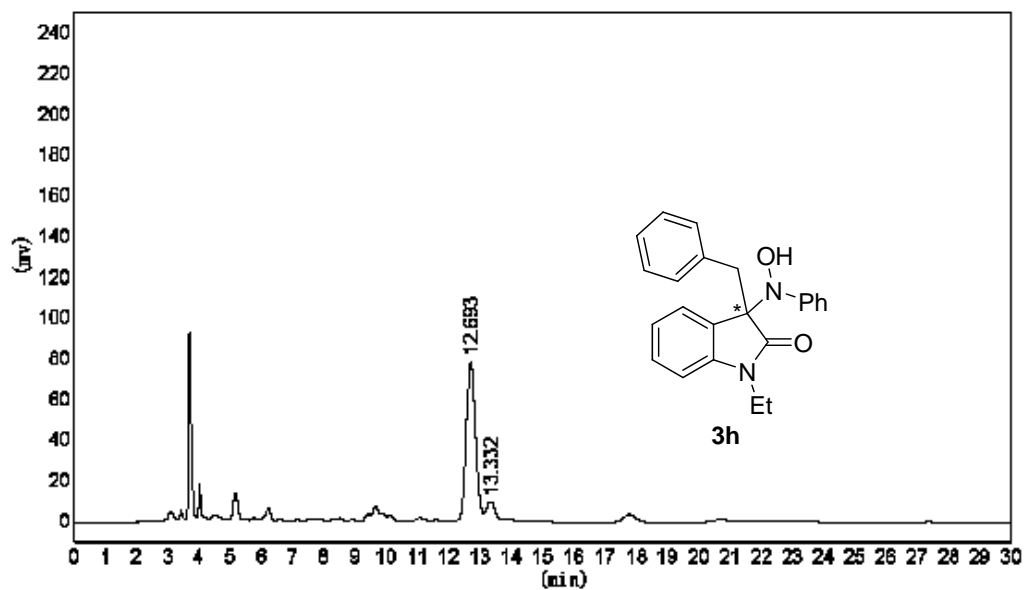

| Peak | RT(min) | Height (mV*sec) | Area (mv)   | Area (%) |
|------|---------|-----------------|-------------|----------|
| 1    | 12.693  | 78077.680       | 1538623.875 | 90.6350  |
| 2    | 13.332  | 8818.305        | 158979.797  | 9.3650   |

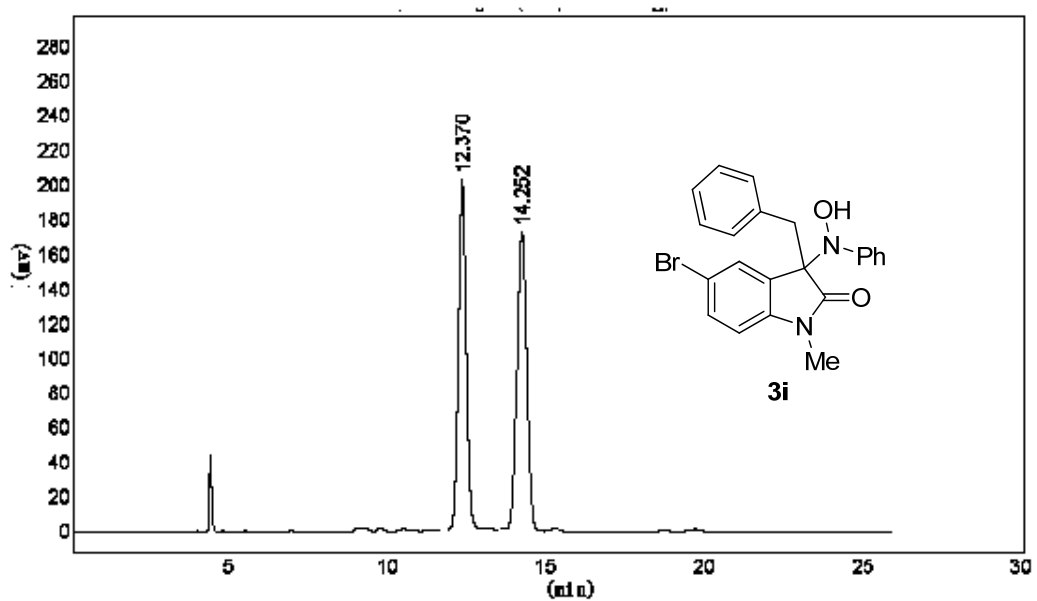

| Peak | RT(min) | Height (mV*sec) | Area (mv)   | Area (%) |
|------|---------|-----------------|-------------|----------|
| 1    | 12.370  | 201963.891      | 3645128.500 | 49.9703  |
| 2    | 14.252  | 172260.391      | 3649466.250 | 50.0297  |

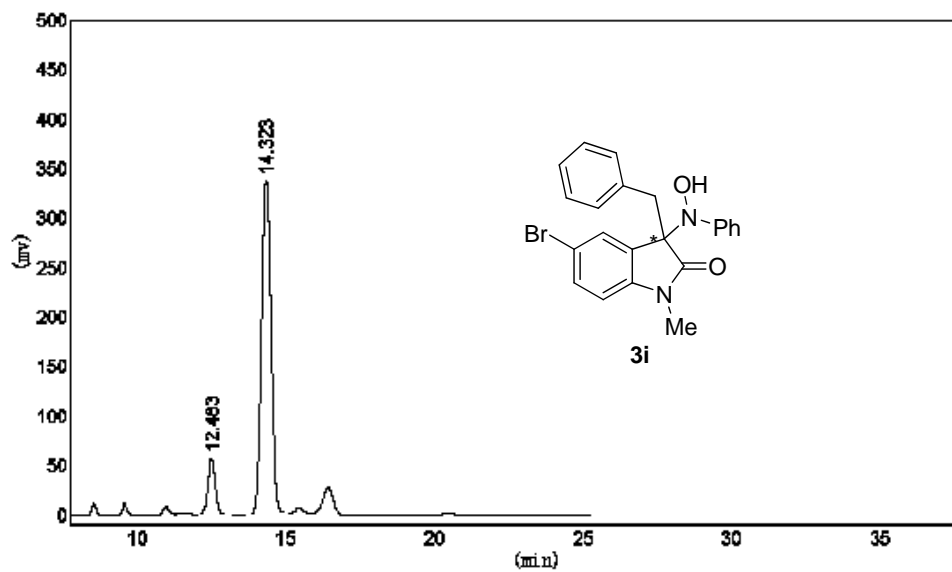

| Peak | RT(min) | Height (mV*sec) | Area (mv)   | Area (%) |
|------|---------|-----------------|-------------|----------|
| 1    | 12.483  | 57358.094       | 1033680.563 | 12.4628  |
| 2    | 14.323  | 337738.438      | 7260446.000 | 87.5372  |

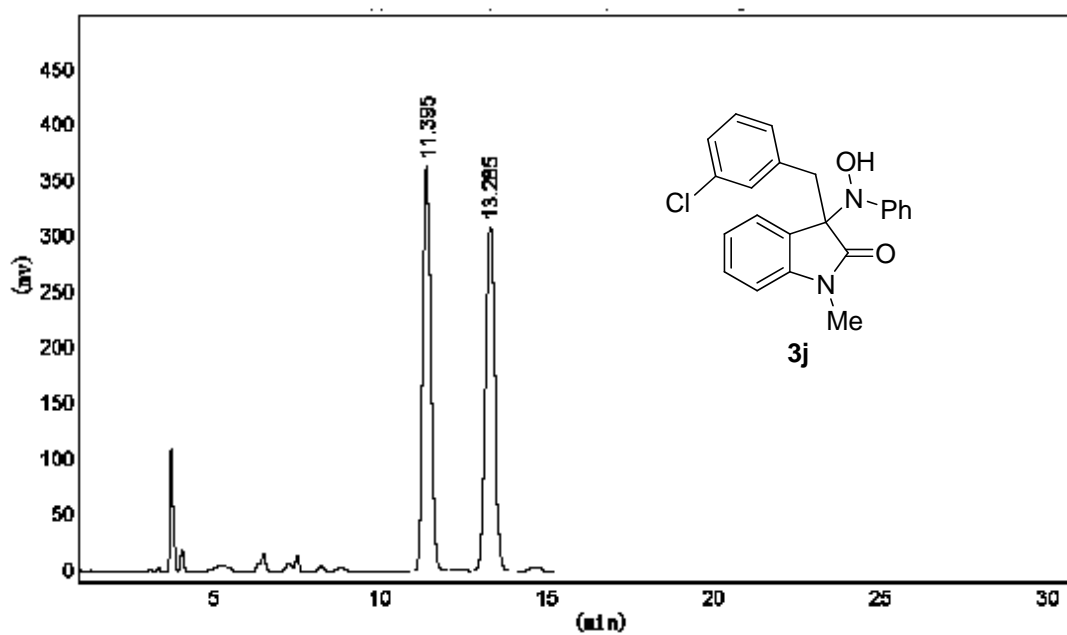

| Peak | RT(min) | Height (mV*sec) | Area (mv)   | Area (%) |
|------|---------|-----------------|-------------|----------|
| 1    | 11.395  | 364566.719      | 5912731.500 | 50.0326  |
| 2    | 13.285  | 309658.969      | 5905020.000 | 49.9674  |



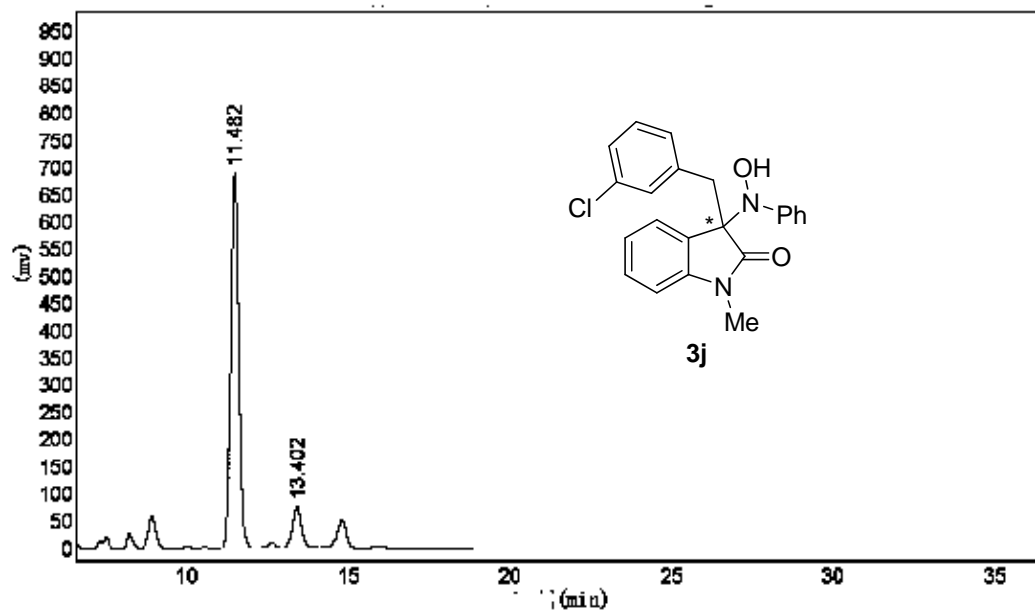

| Peak | RT(min) | Height (mV*sec) | Area (mv)    | Area (%) |
|------|---------|-----------------|--------------|----------|
| 1    | 11.482  | 689435.563      | 11494634.000 | 88.7106  |
| 2    | 13.402  | 76354.242       | 1462824.750  | 11.2894  |

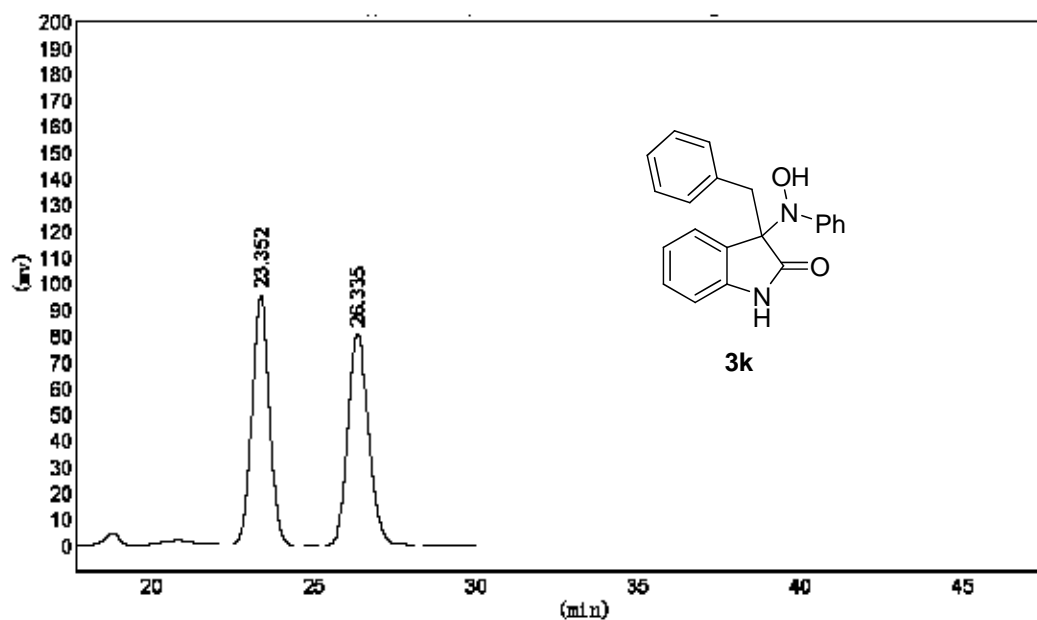

| Peak | RT(min) | Height (mV*sec) | Area (mv)   | Area (%) |
|------|---------|-----------------|-------------|----------|
| 1    | 23.352  | 95154.875       | 3564904.250 | 49.6129  |
| 2    | 26.335  | 80752.125       | 3620536.250 | 50.3871  |

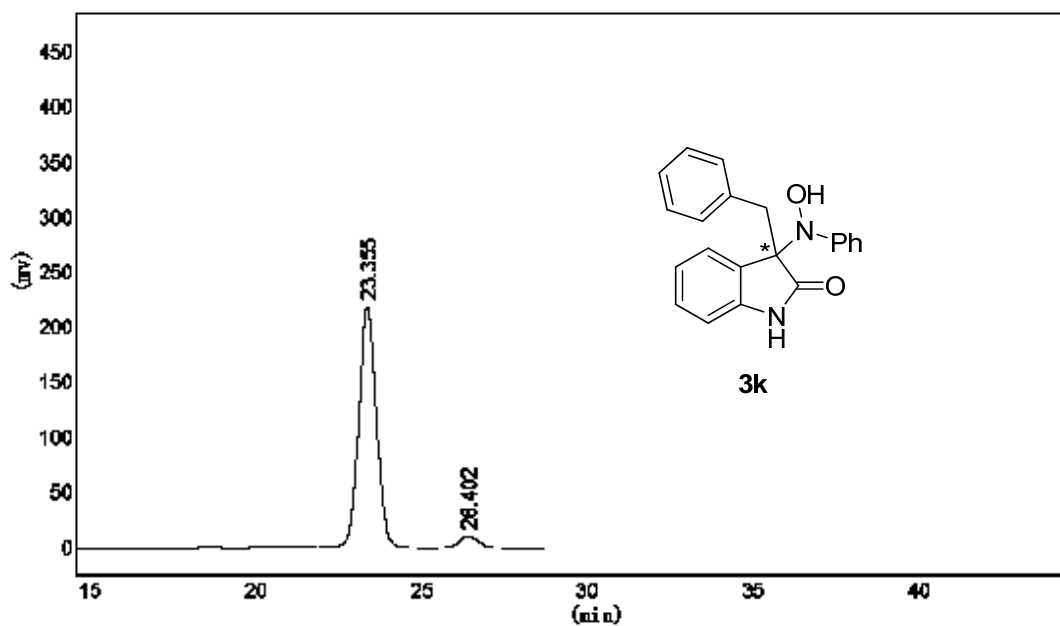

C

| Peak | RT(min) | Height (mV*sec) | Area (mv)   | Area (%) |
|------|---------|-----------------|-------------|----------|
| 1    | 23.355  | 218264.813      | 8104260.000 | 94.8476  |
| 2    | 26.402  | 10503.429       | 440244.813  | 5.1524   |

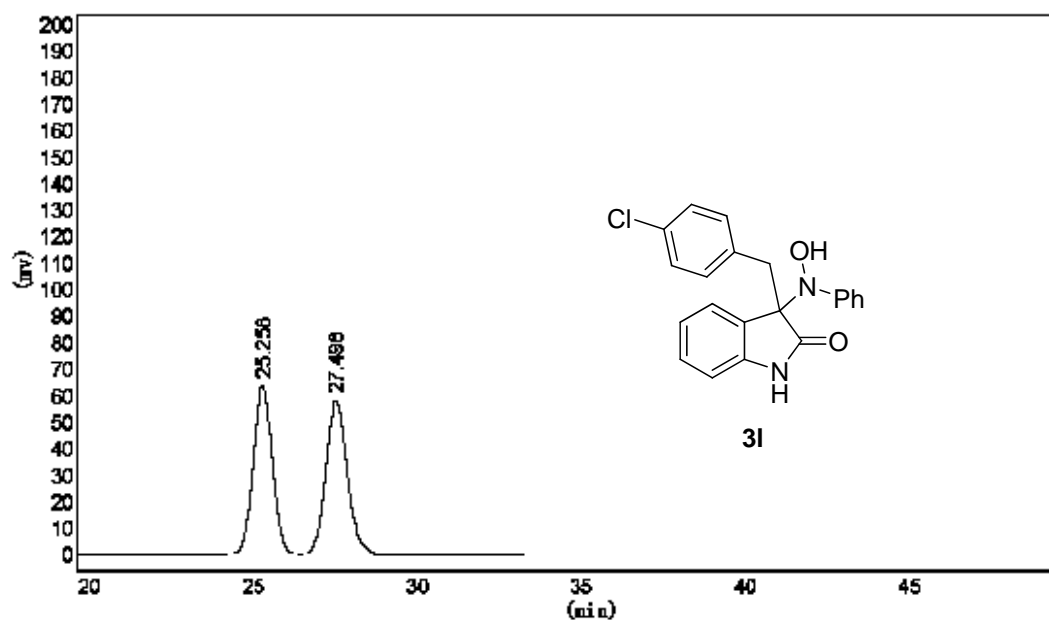

| Peak | RT(min) | Height (mV*sec) | Area (mv) | Area (%) |
|------|---------|-----------------|-----------|----------|
|------|---------|-----------------|-----------|----------|

C

|   |        |           |             |         |
|---|--------|-----------|-------------|---------|
| 1 | 25.258 | 63639.457 | 2567564.250 | 49.3016 |
| 2 | 27.498 | 58085.191 | 2640308.500 | 50.6984 |

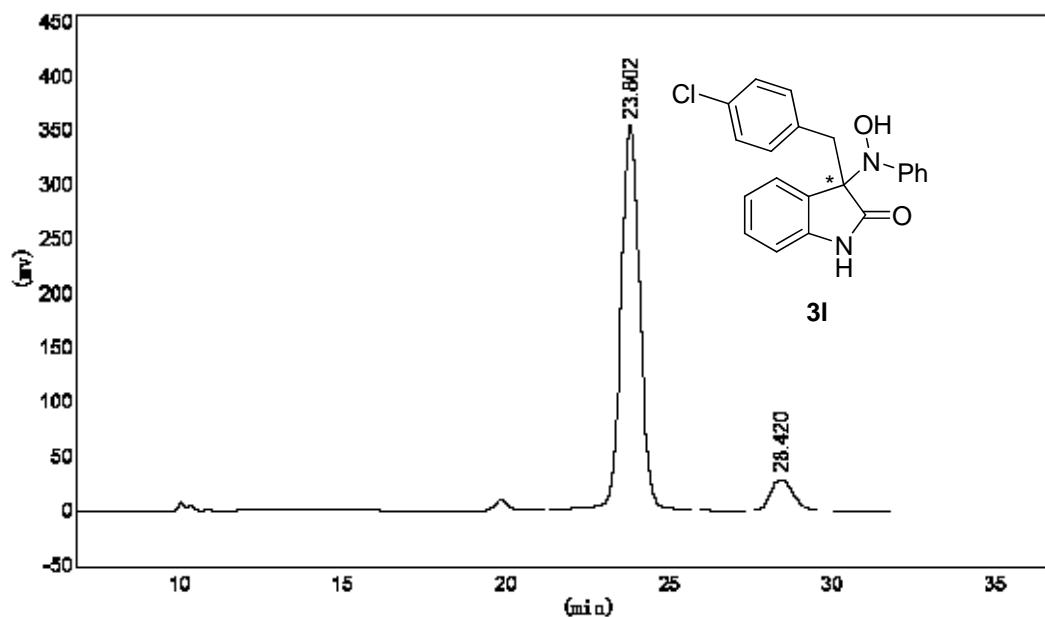

| Peak | RT(min) | Height (mV*sec) | Area (mv)    | Area (%) |
|------|---------|-----------------|--------------|----------|
| 1    | 23.802  | 353945.438      | 14191307.000 | 90.8197  |
| 2    | 28.420  | 29523.873       | 1434497.625  | 9.1803   |

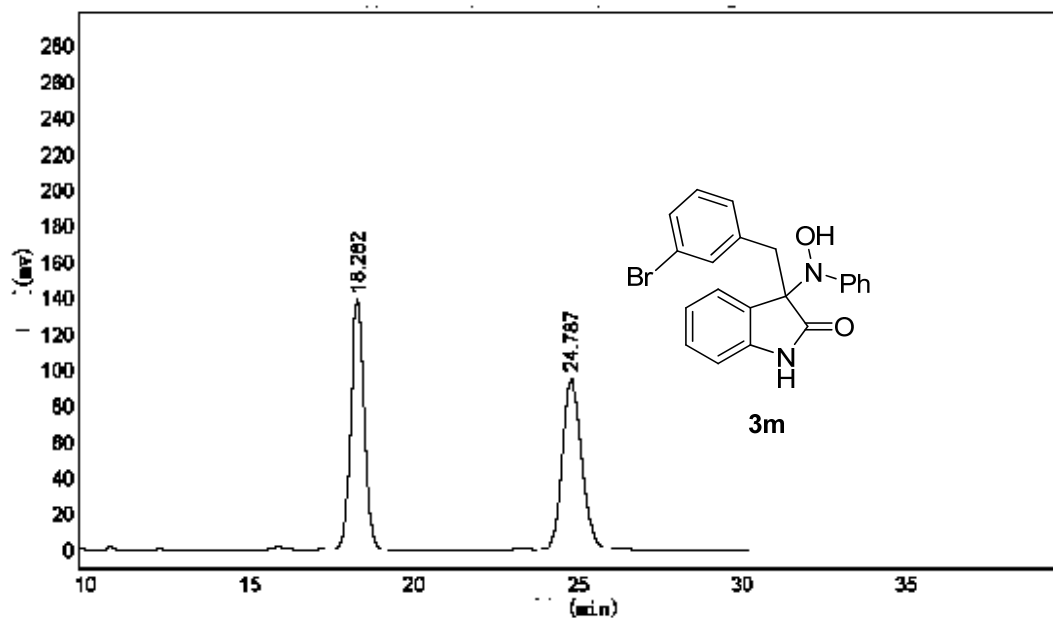

| Peak | RT(min) | Height (mV*sec) | Area (mv)   | Area (%) |
|------|---------|-----------------|-------------|----------|
| 1    | 18.282  | 138636.078      | 3967913.000 | 51.0167  |
| 2    | 24.787  | 94130.883       | 3809755.750 | 48.9833  |

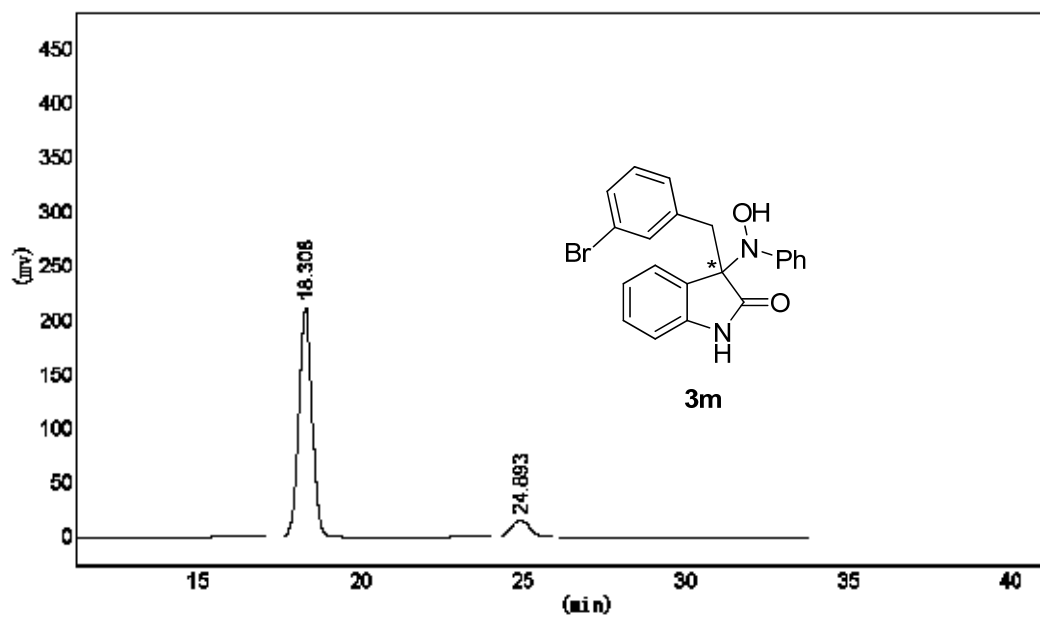

| Peak | RT(min) | Height (mV*sec) | Area (mv)   | Area (%) |
|------|---------|-----------------|-------------|----------|
| 1    | 18.308  | 211036.531      | 6053562.500 | 91.1069  |
| 2    | 24.893  | 14646.946       | 590897.375  | 8.8931   |

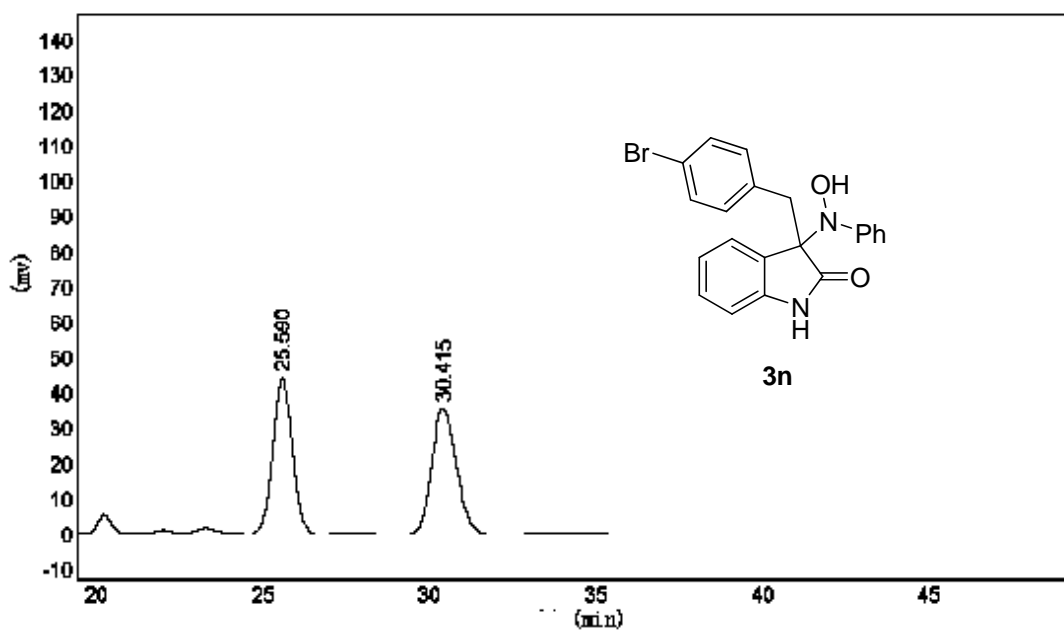

| Peak | RT(min) | Height (mV*sec) | Area (mv)   | Area (%) |
|------|---------|-----------------|-------------|----------|
| 1    | 25.590  | 44059.523       | 1781857.625 | 49.2518  |
| 2    | 30.415  | 35699.344       | 1835997.250 | 50.7482  |

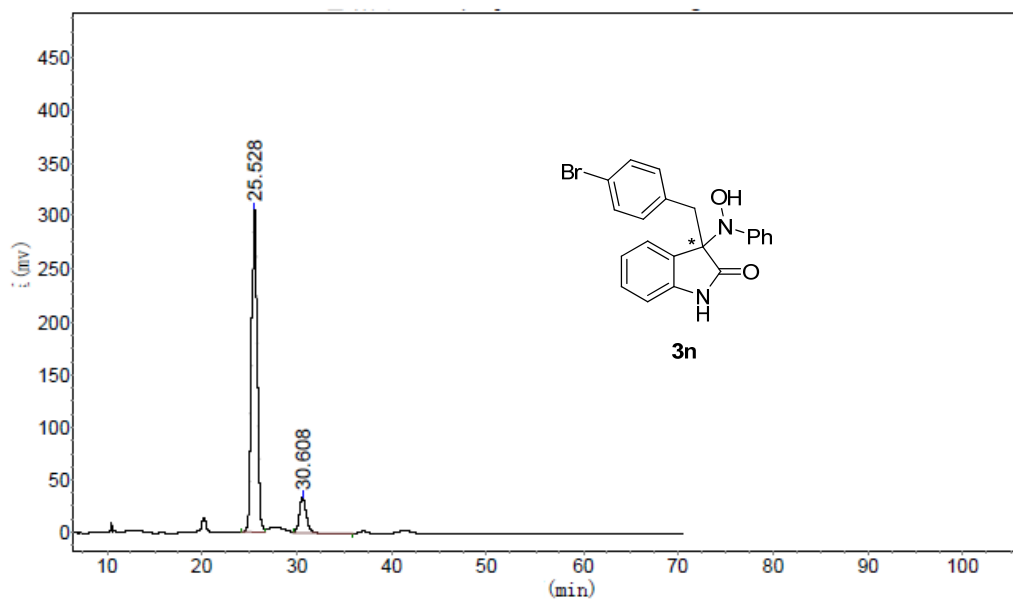

| Peak | RT(min) | Height (mV*sec) | Area (mv)    | Area (%) |
|------|---------|-----------------|--------------|----------|
| 1    | 25.528  | 306808.781      | 12676039.000 | 87.8658  |
| 2    | 30.608  | 34345.645       | 1750558.375  | 12.1342  |

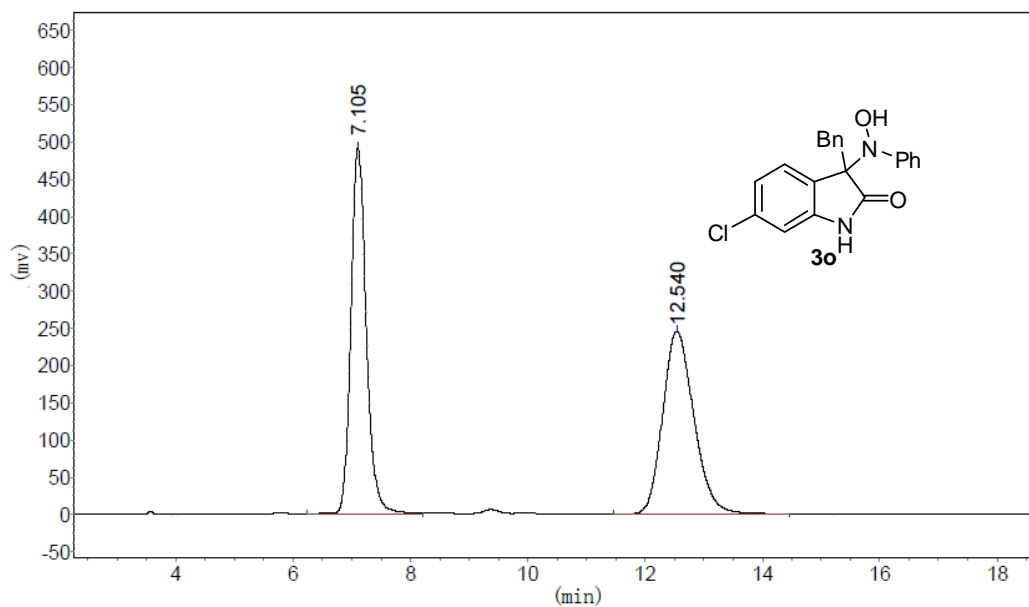

| Peak | RT(min) | Height (mV*sec) | Area (mv)   | Area (%) |
|------|---------|-----------------|-------------|----------|
| 1    | 7.105   | 492218.156      | 8990405.000 | 49.8369  |
| 2    | 12.540  | 245709.922      | 9049236.000 | 50.1631  |

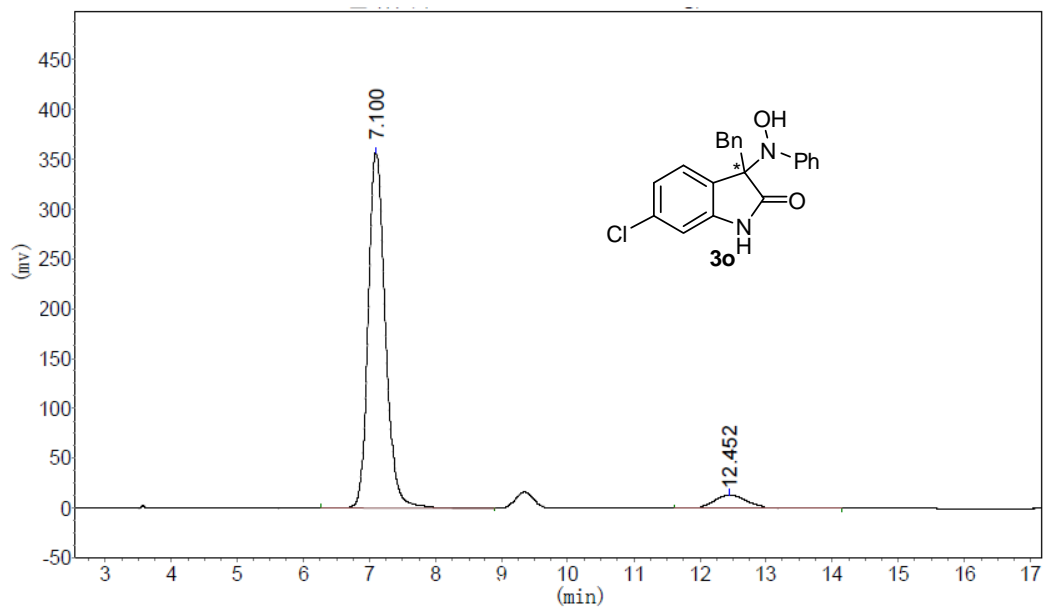

| Peak | RT(min) | Height (mV*sec) | Area (mv)   | Area (%) |
|------|---------|-----------------|-------------|----------|
| 1    | 7.100   | 356760.094      | 6399166.500 | 93.0299  |
| 2    | 12.452  | 13447.665       | 479449.375  | 6.9701   |

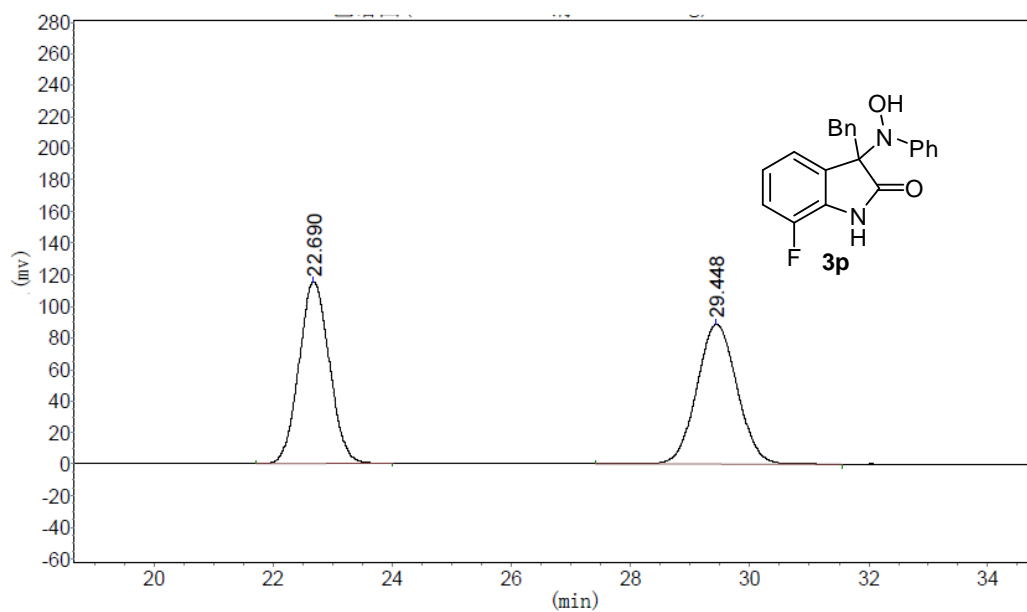

| Peak | RT(min) | Height (mV*sec) | Area (mv)   | Area (%) |
|------|---------|-----------------|-------------|----------|
| 1    | 22.690  | 114958.344      | 4084648.750 | 49.6990  |
| 2    | 29.448  | 88170.172       | 4134124.750 | 50.3010  |

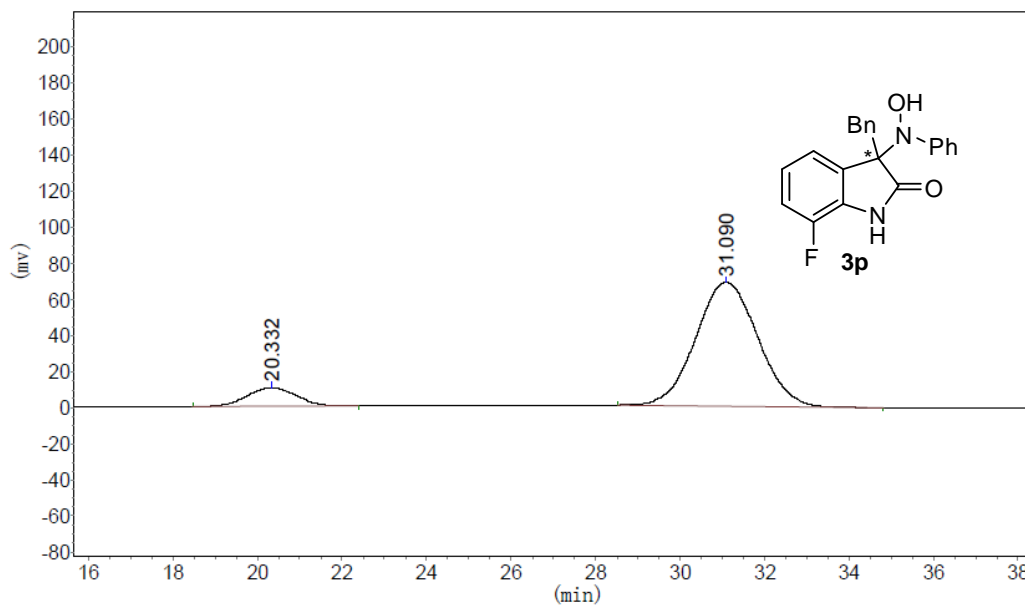

| Peak | RT(min) | Height (mV*sec) | Area (mv)   | Area (%) |
|------|---------|-----------------|-------------|----------|
| 1    | 20.332  | 10594.243       | 844779.438  | 10.8098  |
| 2    | 31.090  | 68517.234       | 6970180.000 | 89.1902  |

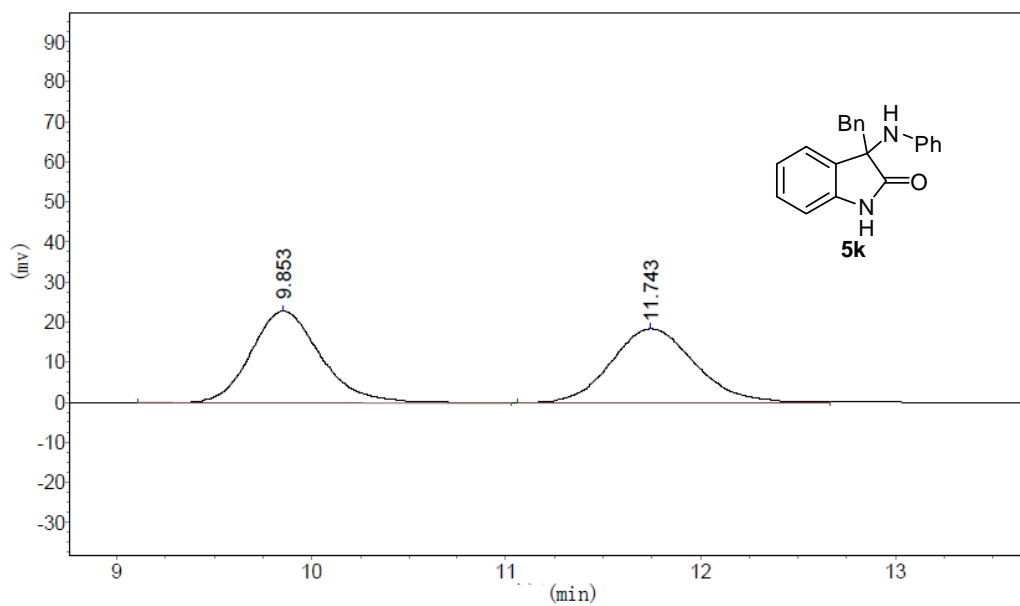

| Peak | RT(min) | Height (mV*sec) | Area (mv)  | Area (%) |
|------|---------|-----------------|------------|----------|
| 1    | 9.853   | 22869.055       | 568481.063 | 50.6500  |
| 2    | 11.743  | 18518.225       | 553889.813 | 49.3500  |

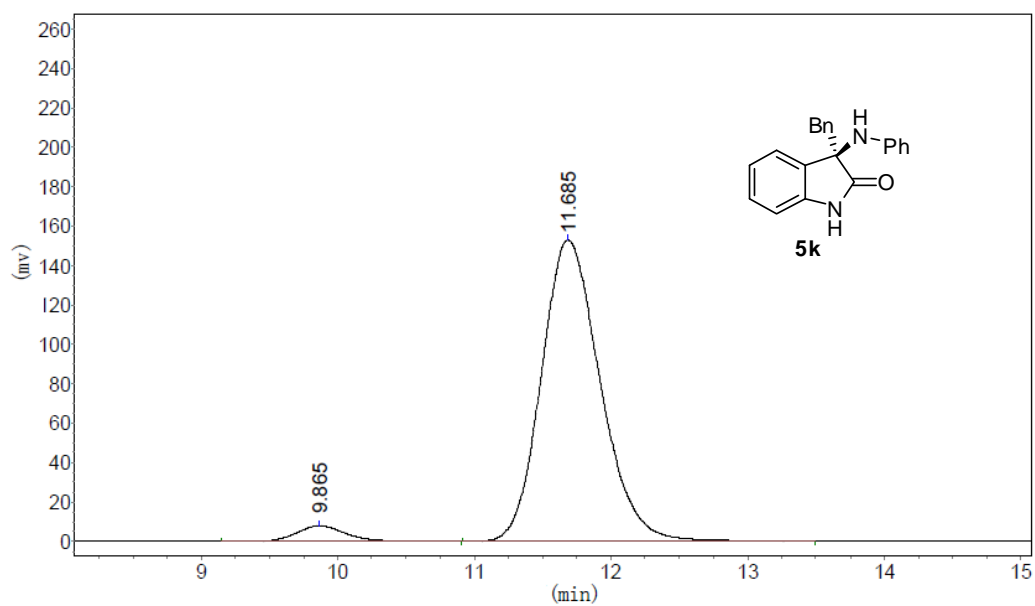

| Peak | RT(min) | Height (mV*sec) | Area (mv)   | Area (%) |
|------|---------|-----------------|-------------|----------|
| 1    | 9.865   | 7993.940        | 200825.875  | 4.1961   |
| 2    | 11.685  | 152990.391      | 4585138.500 | 95.8039  |
